# Supplementary material for: LRRC15 mediates an accessory interaction with the SARS-CoV-2 spike protein
Source: PubMed Central journal article supplement (PMC9897555; doi:10.1371/journal.pbio.3001959), 2023-02-03

Original blot  
Supplementary Figure 2

Blot used in figure

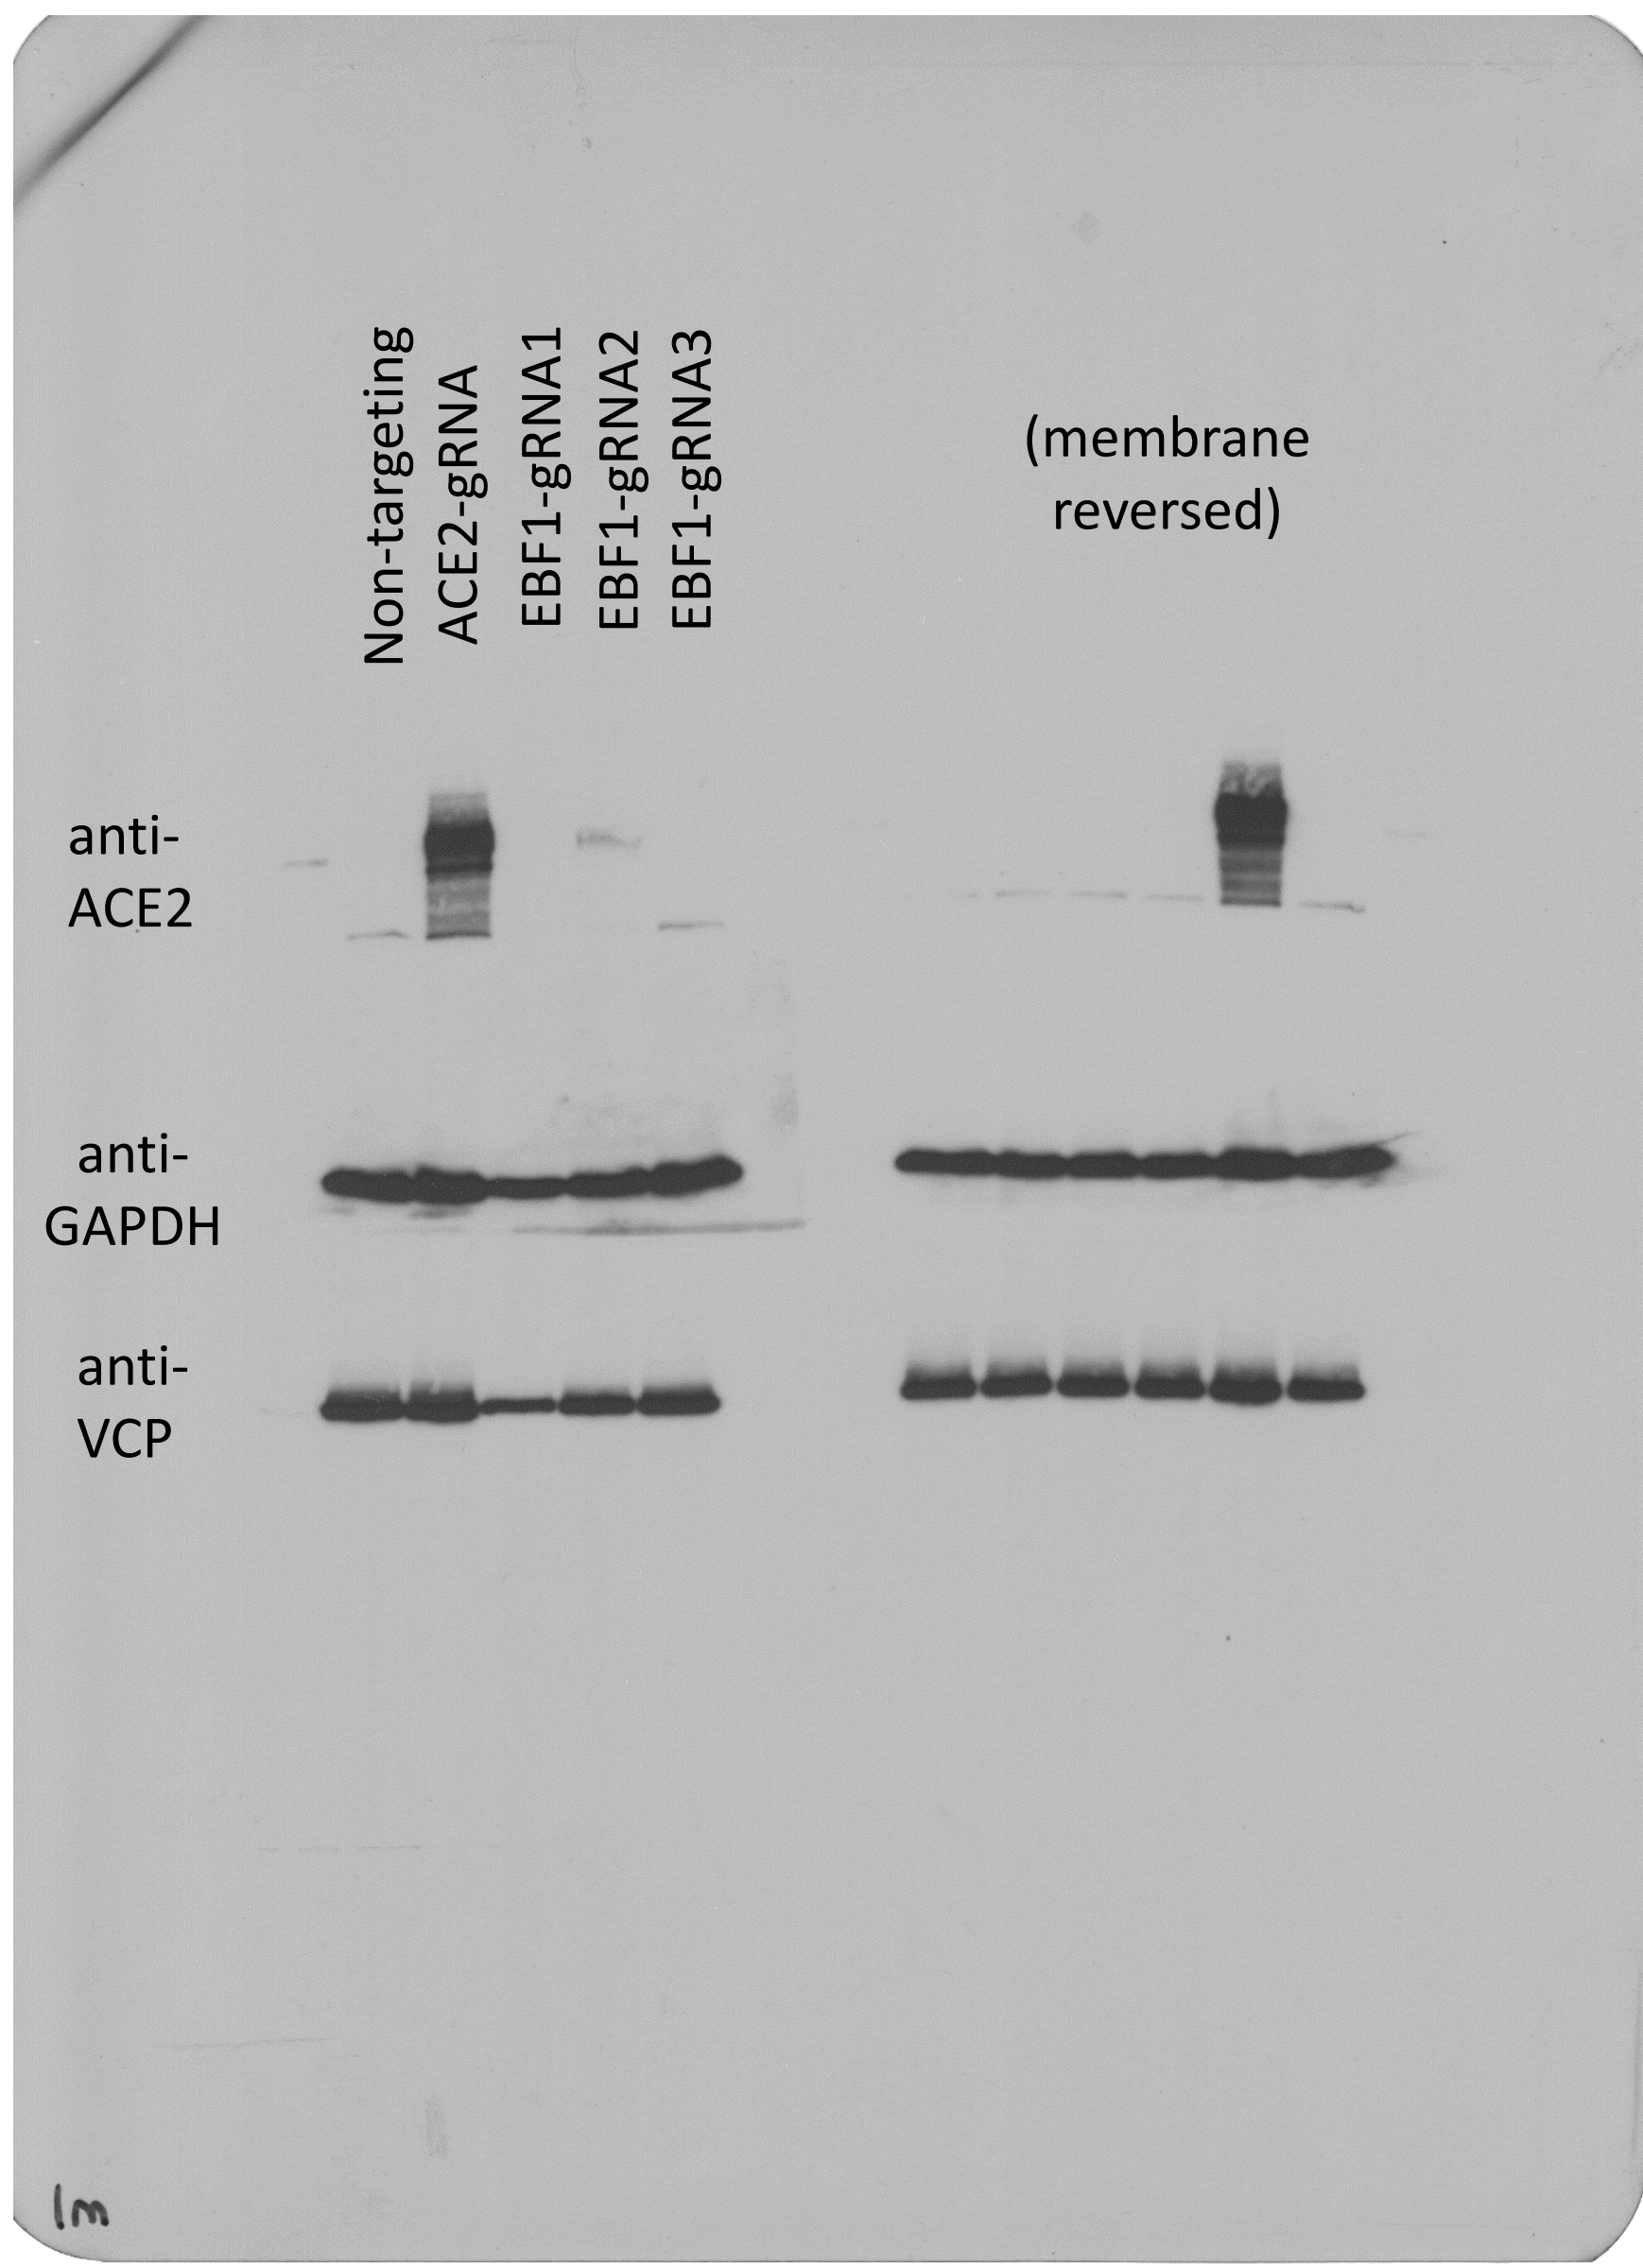

Molecular weight marker and original annotations

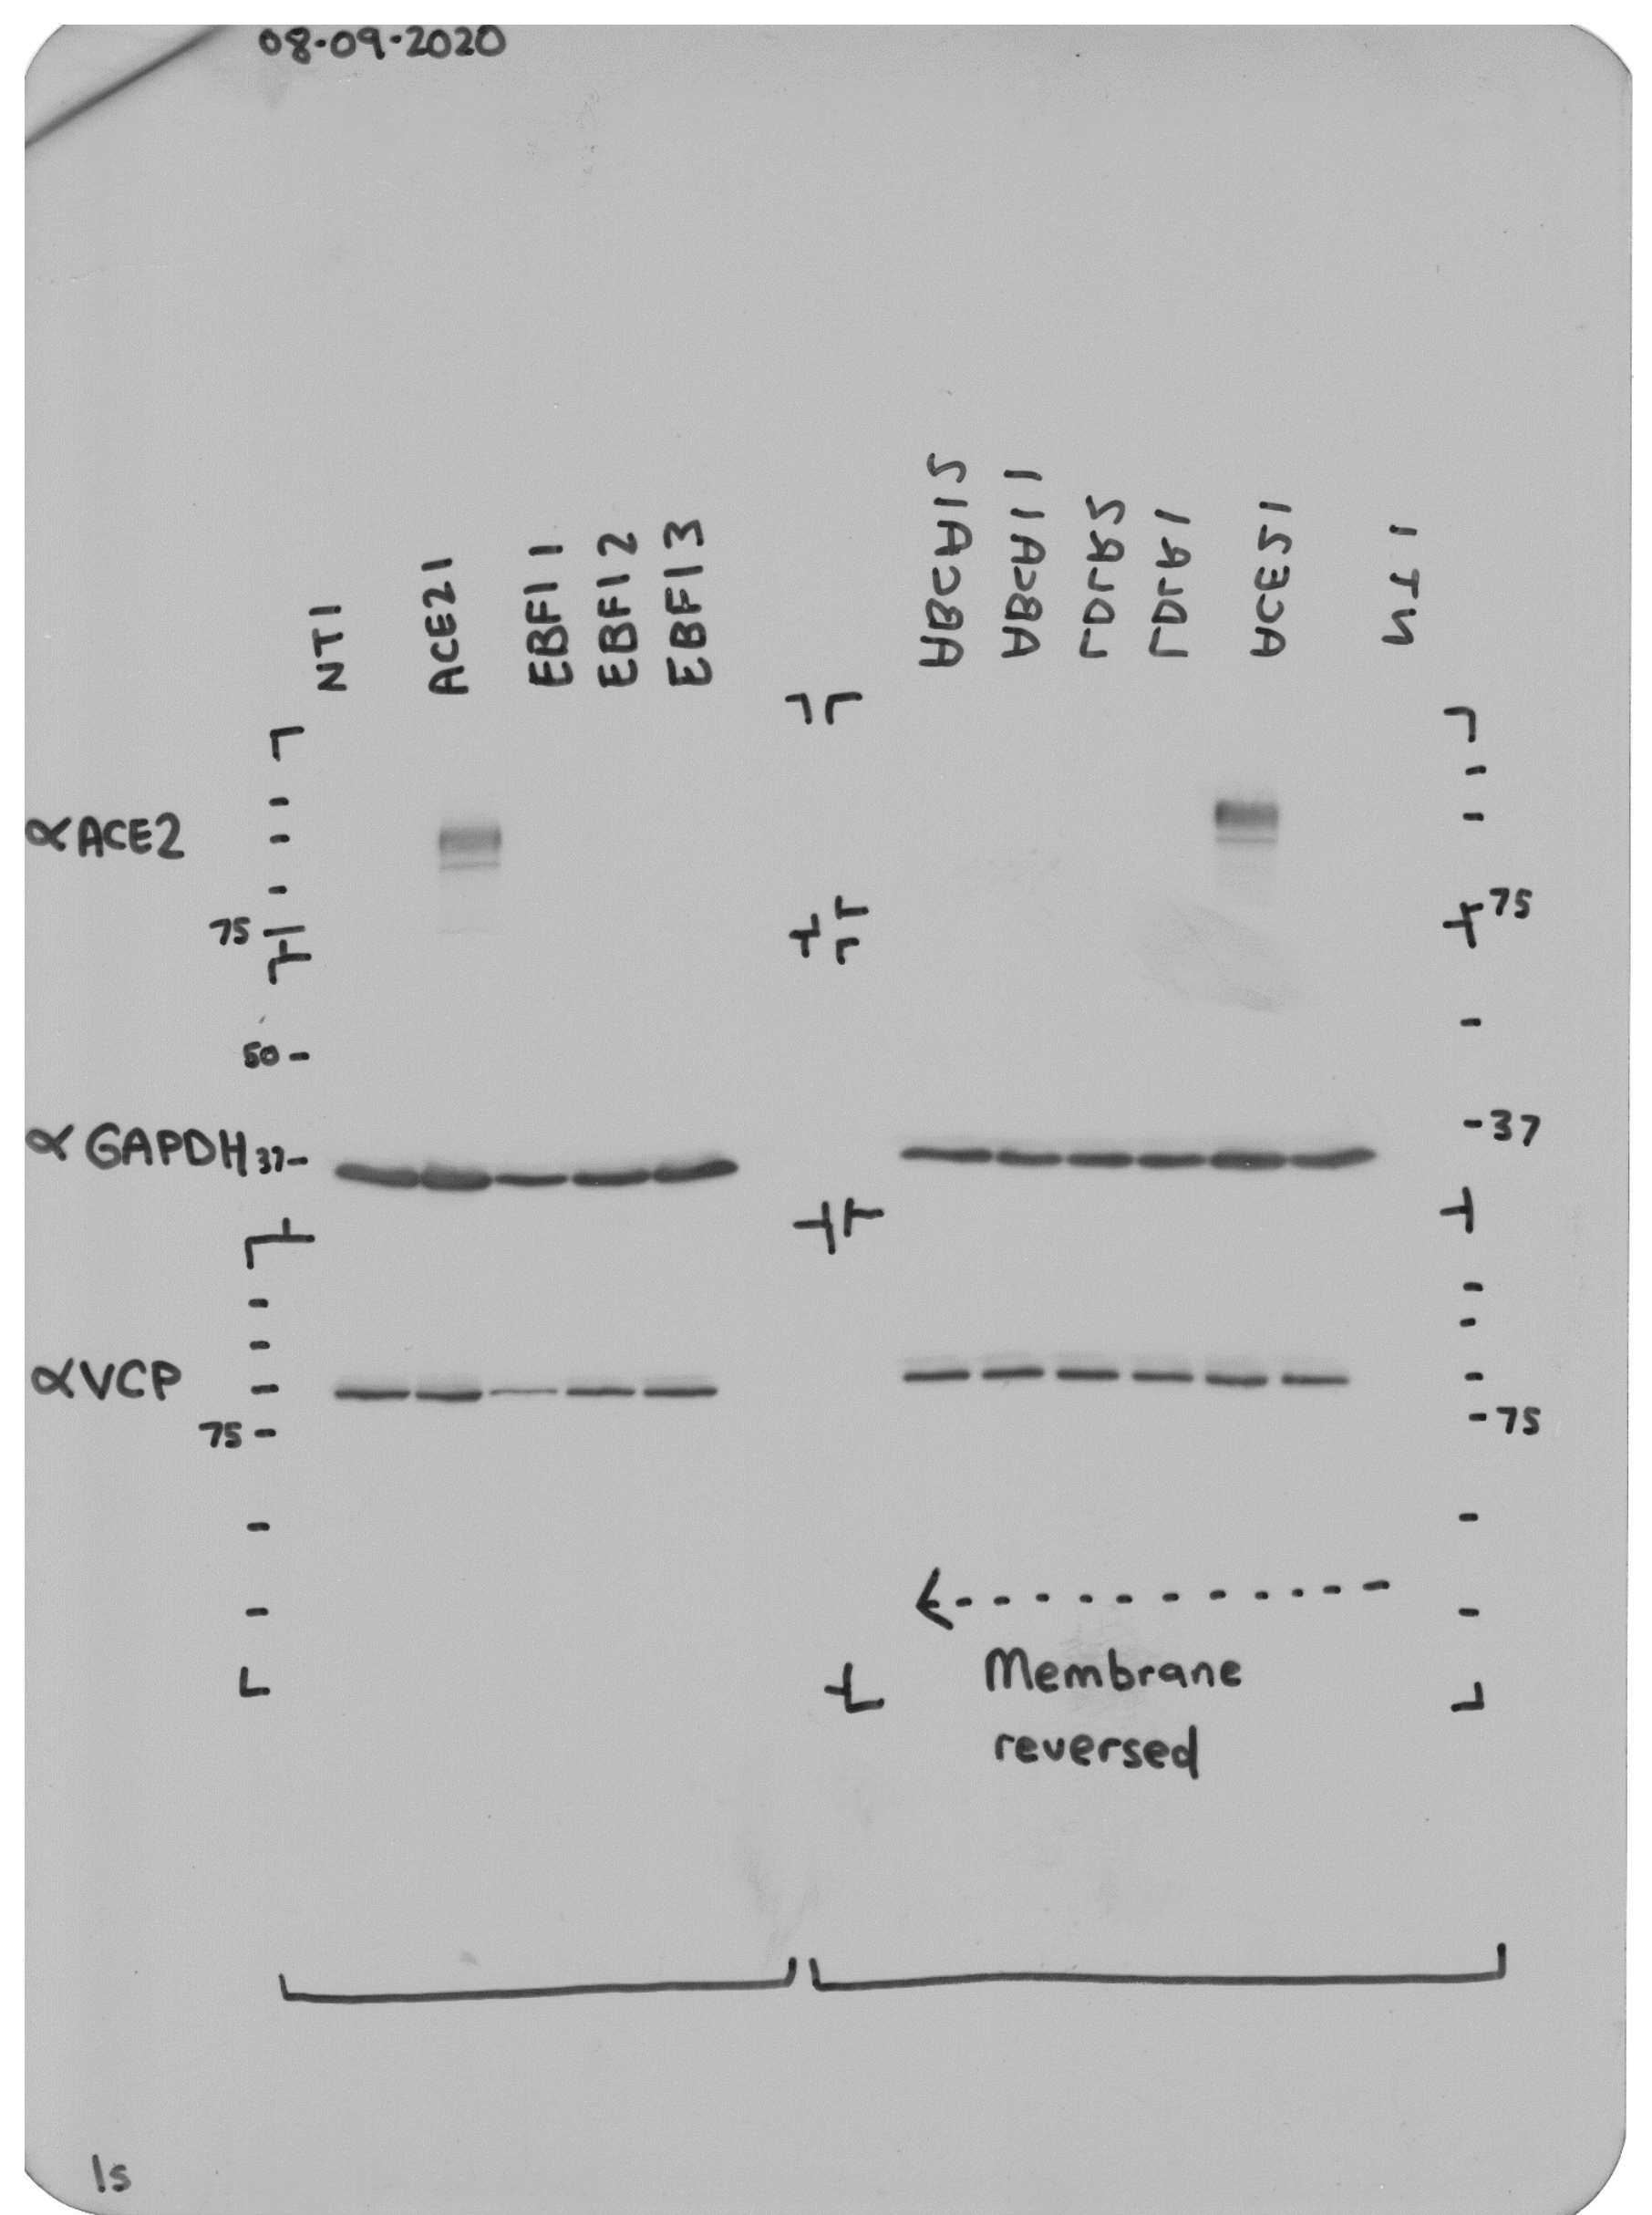

Original blot  
Figure 2 panel F, left side

LRRC15 exposure blot

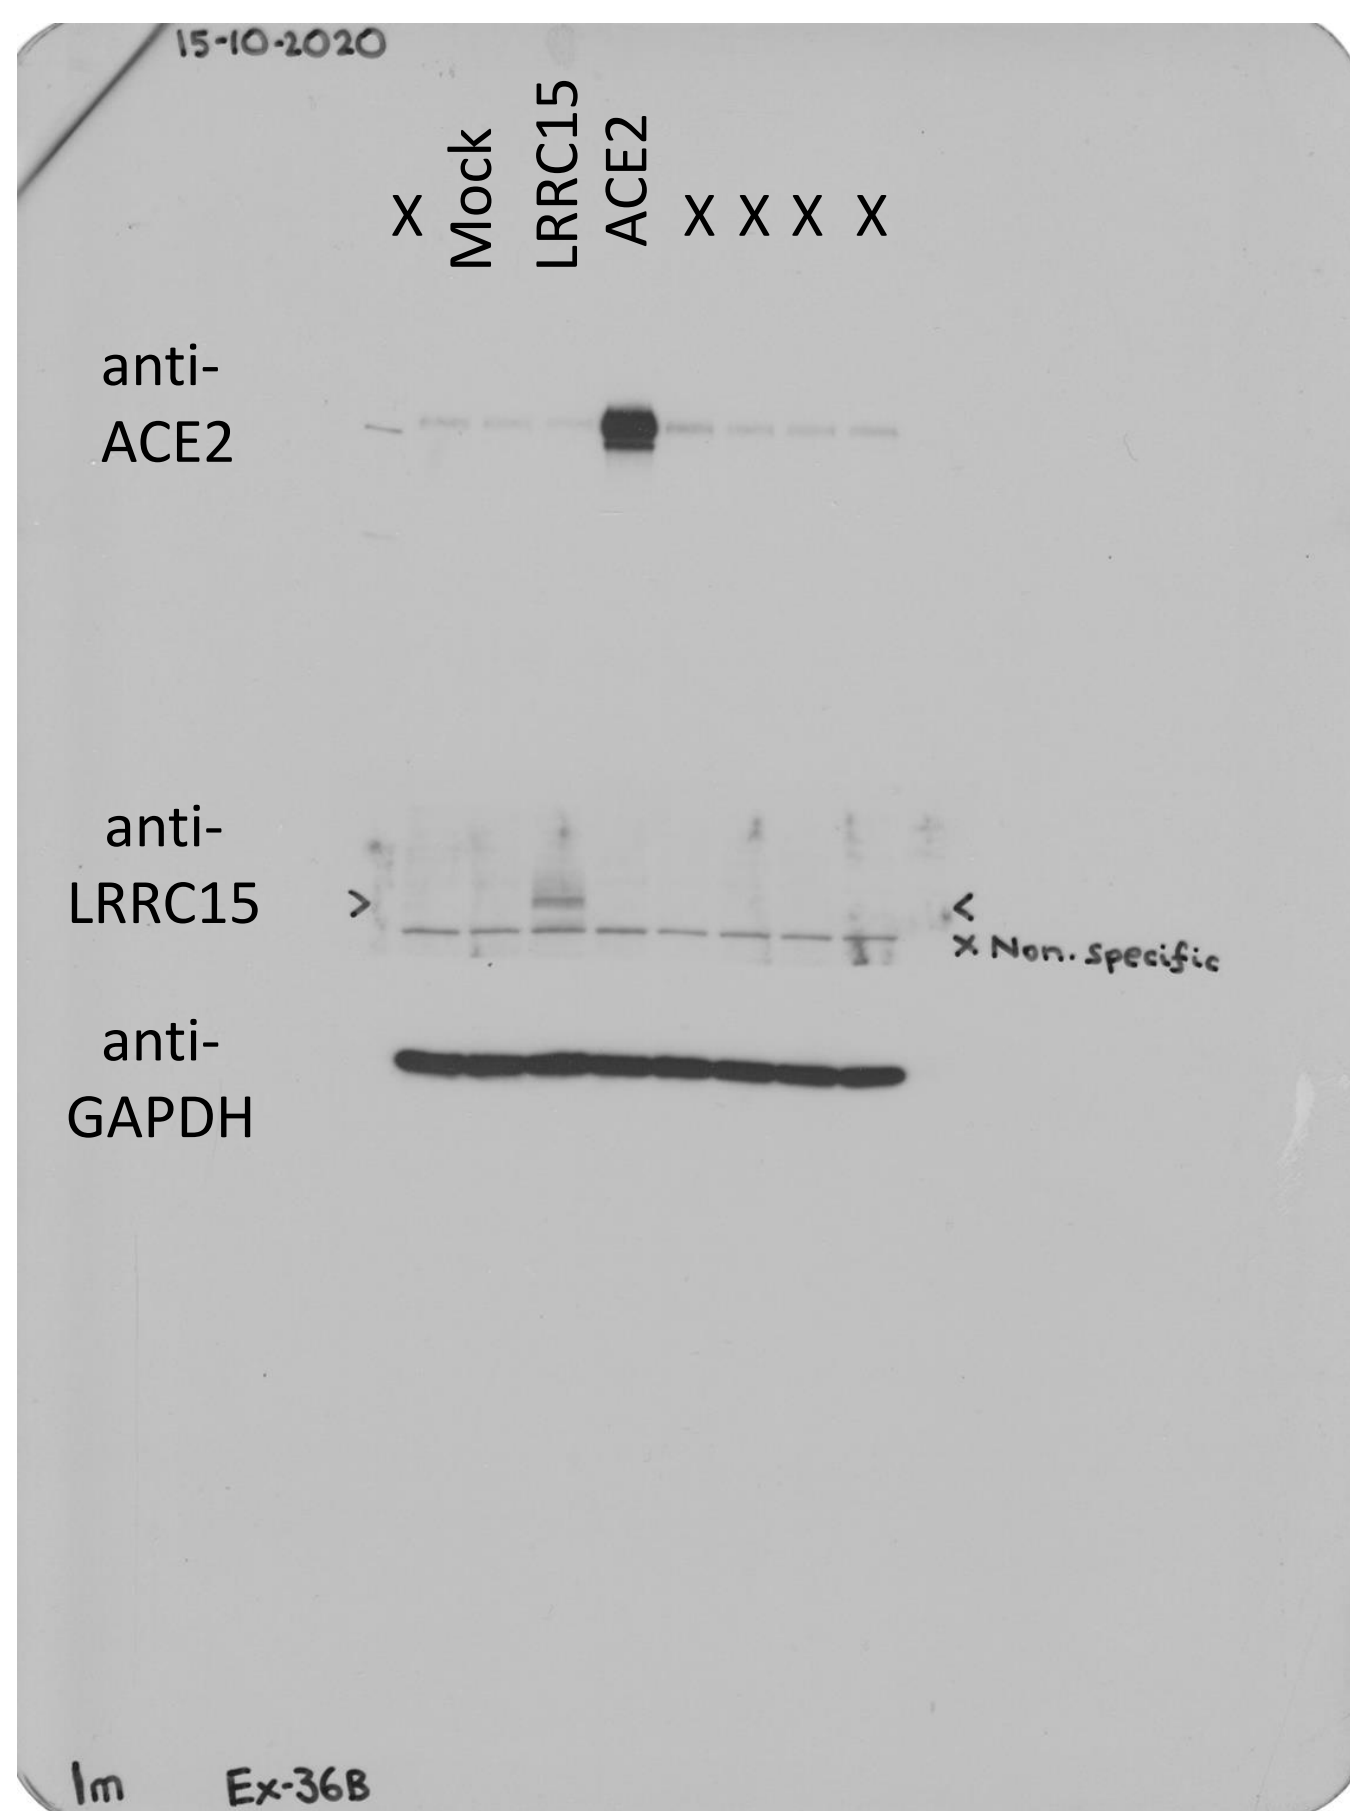

ACE2 long exposure blot

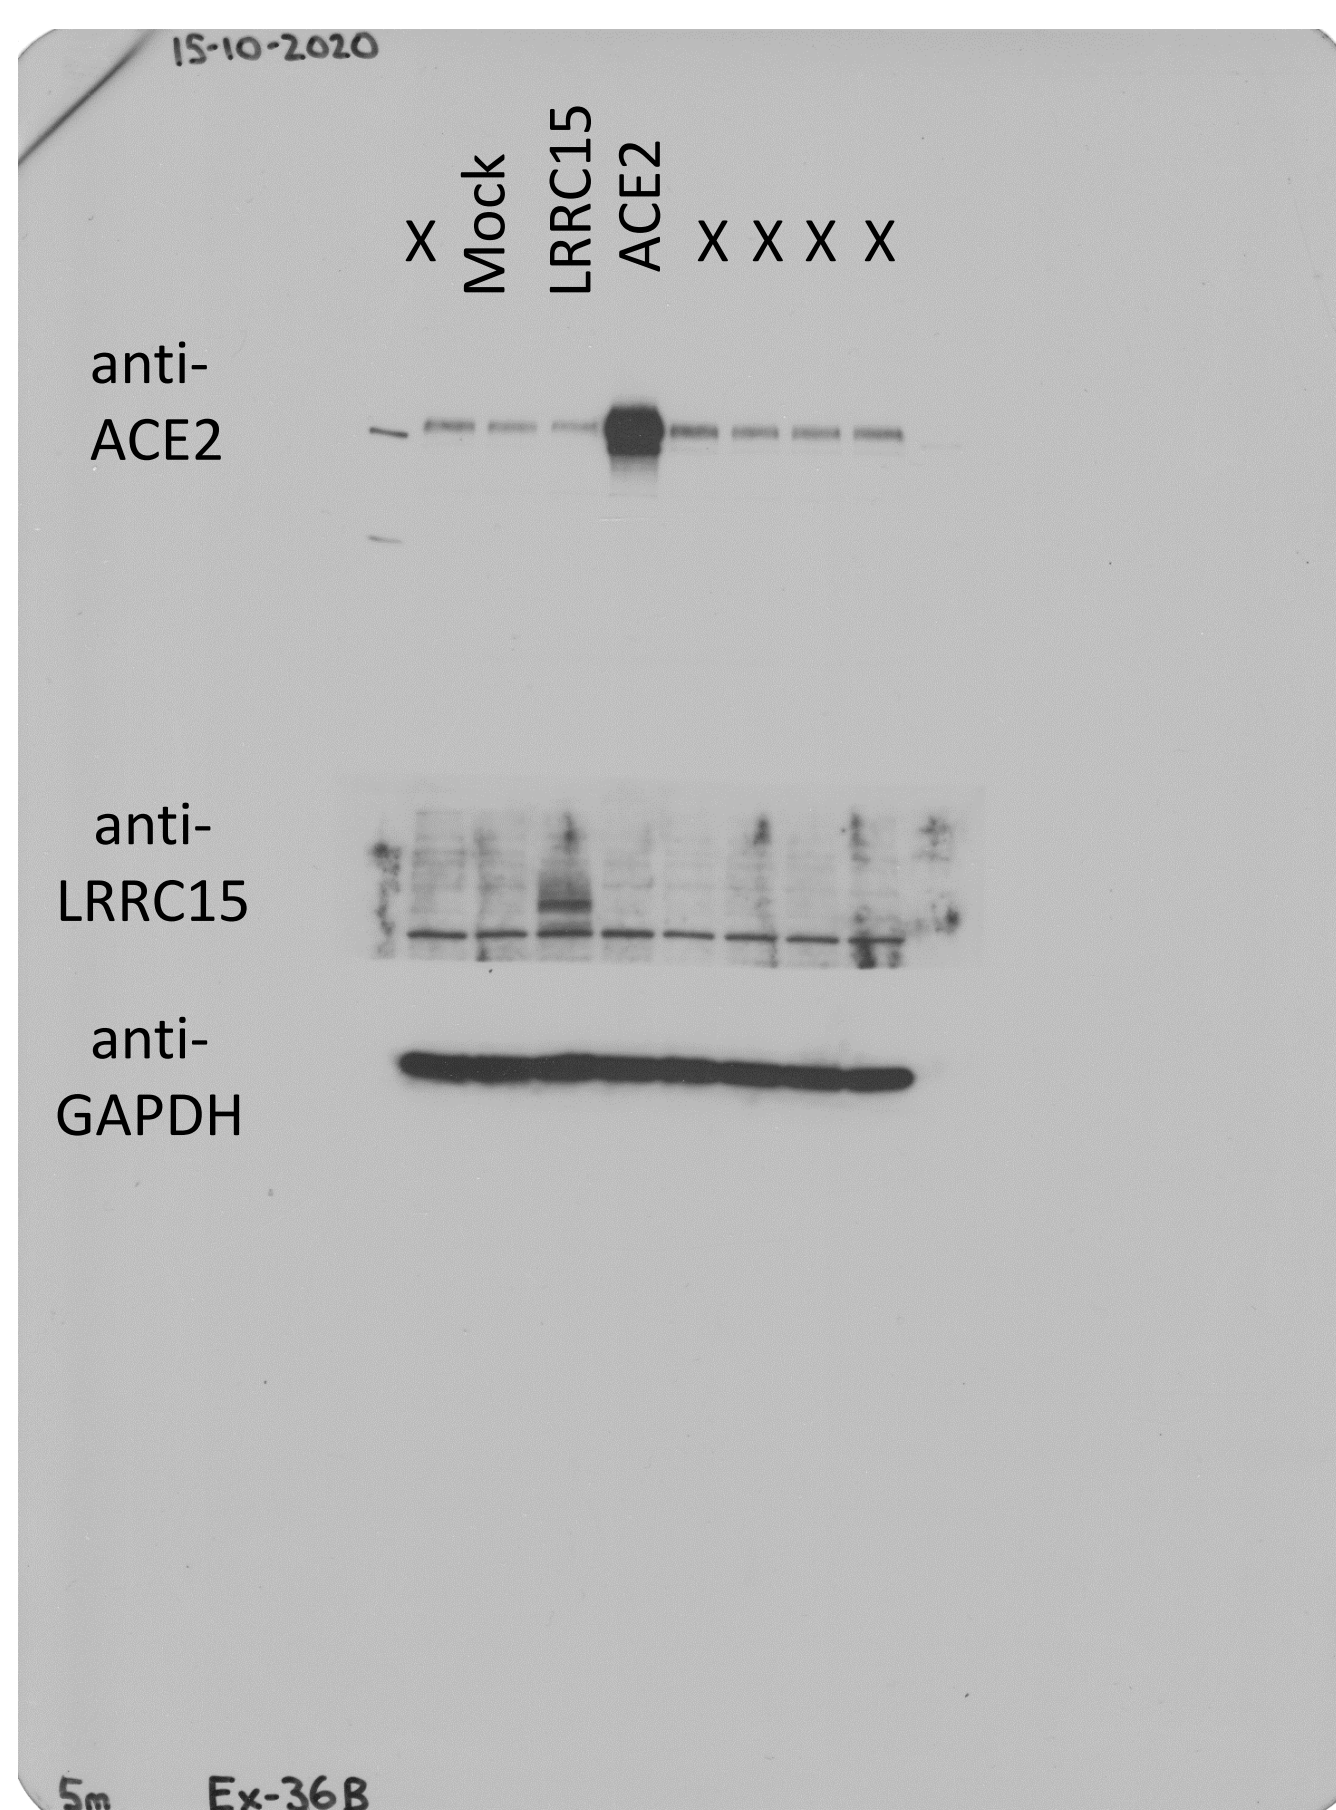

Molecular weight marker and ACE2 short exposure

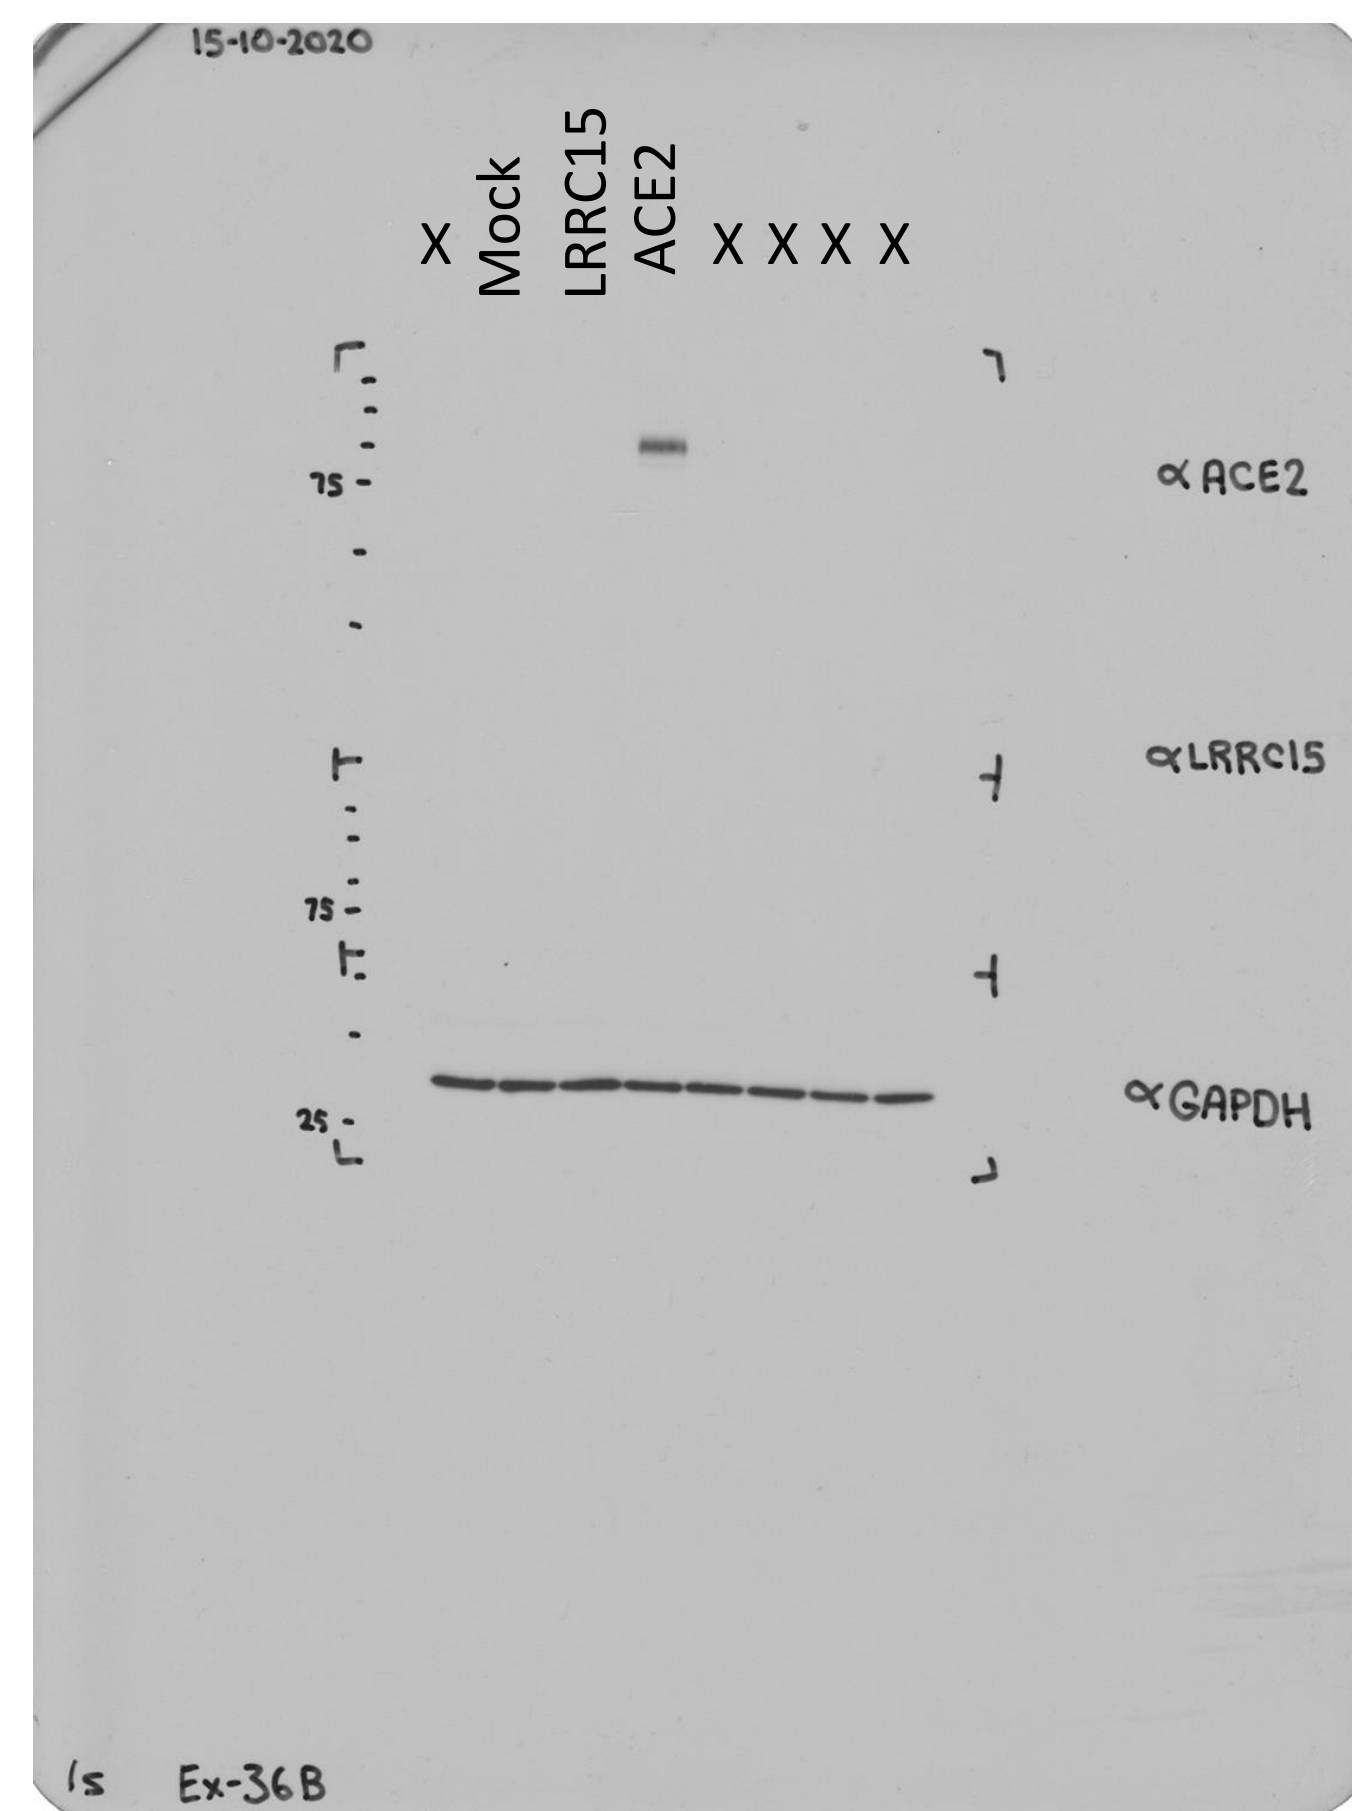

Original blot  
Figure 2 panel F, right side

ACE2 short exposure blot

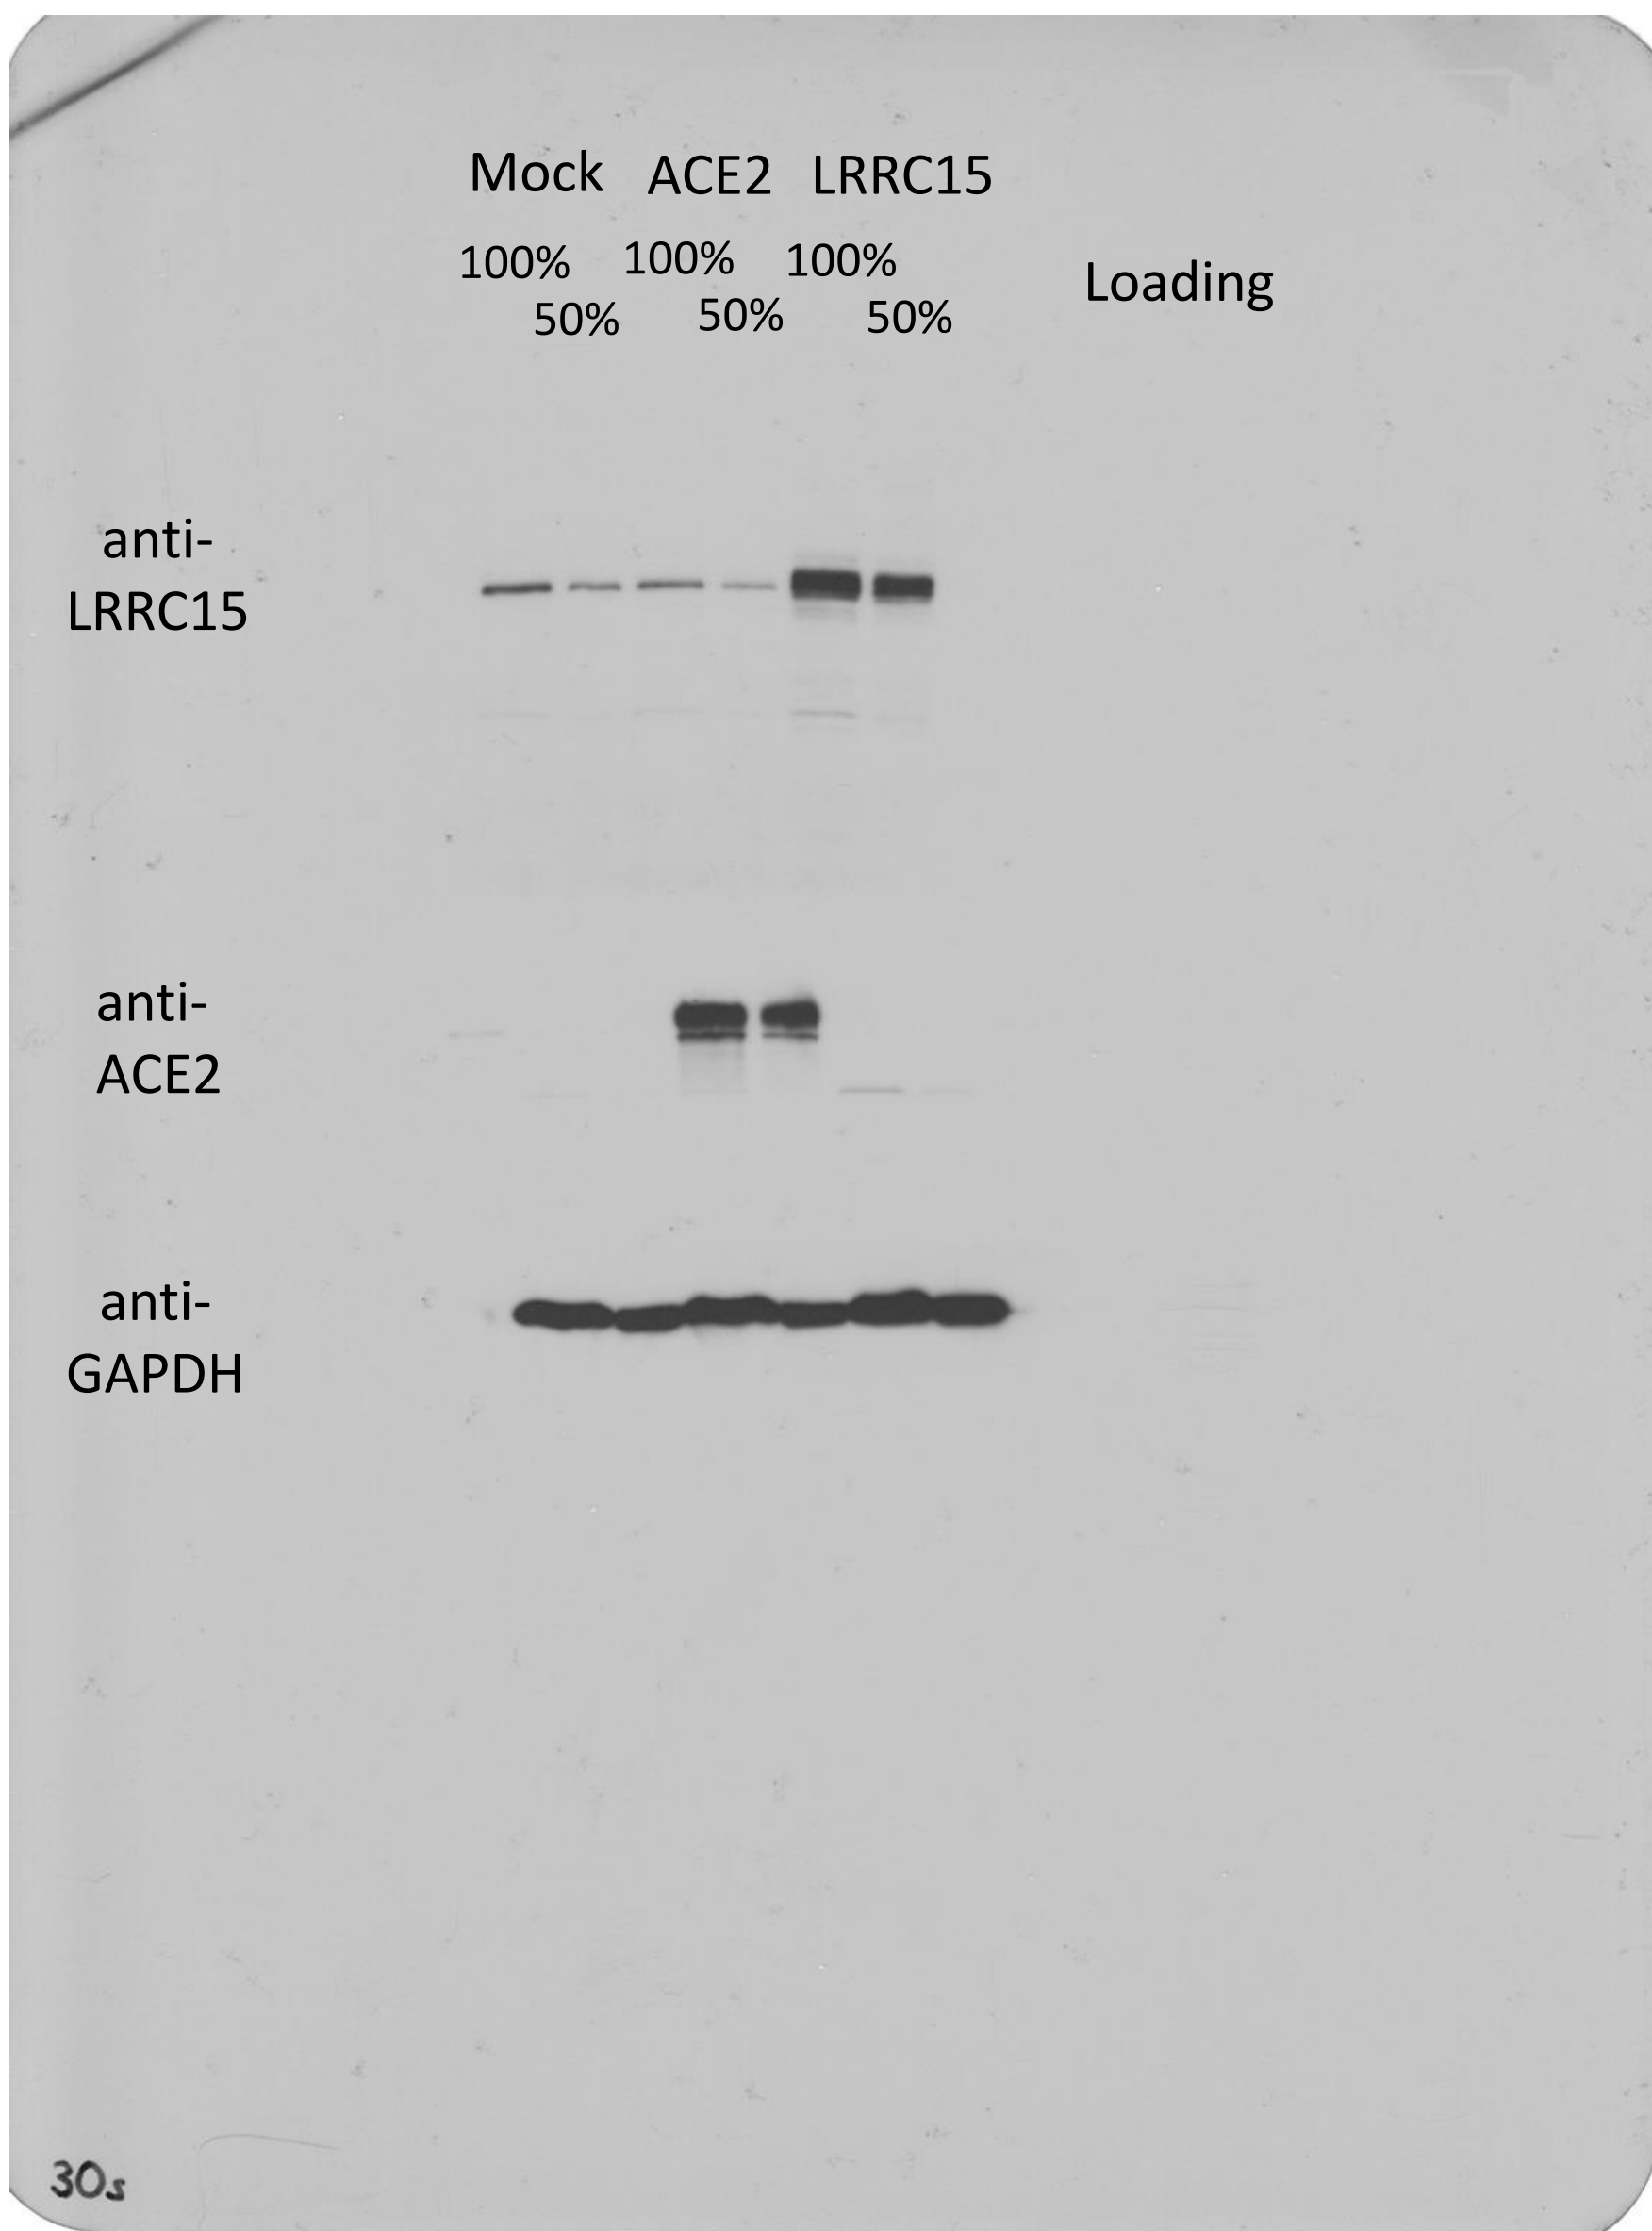

ACE2 long exposure blot

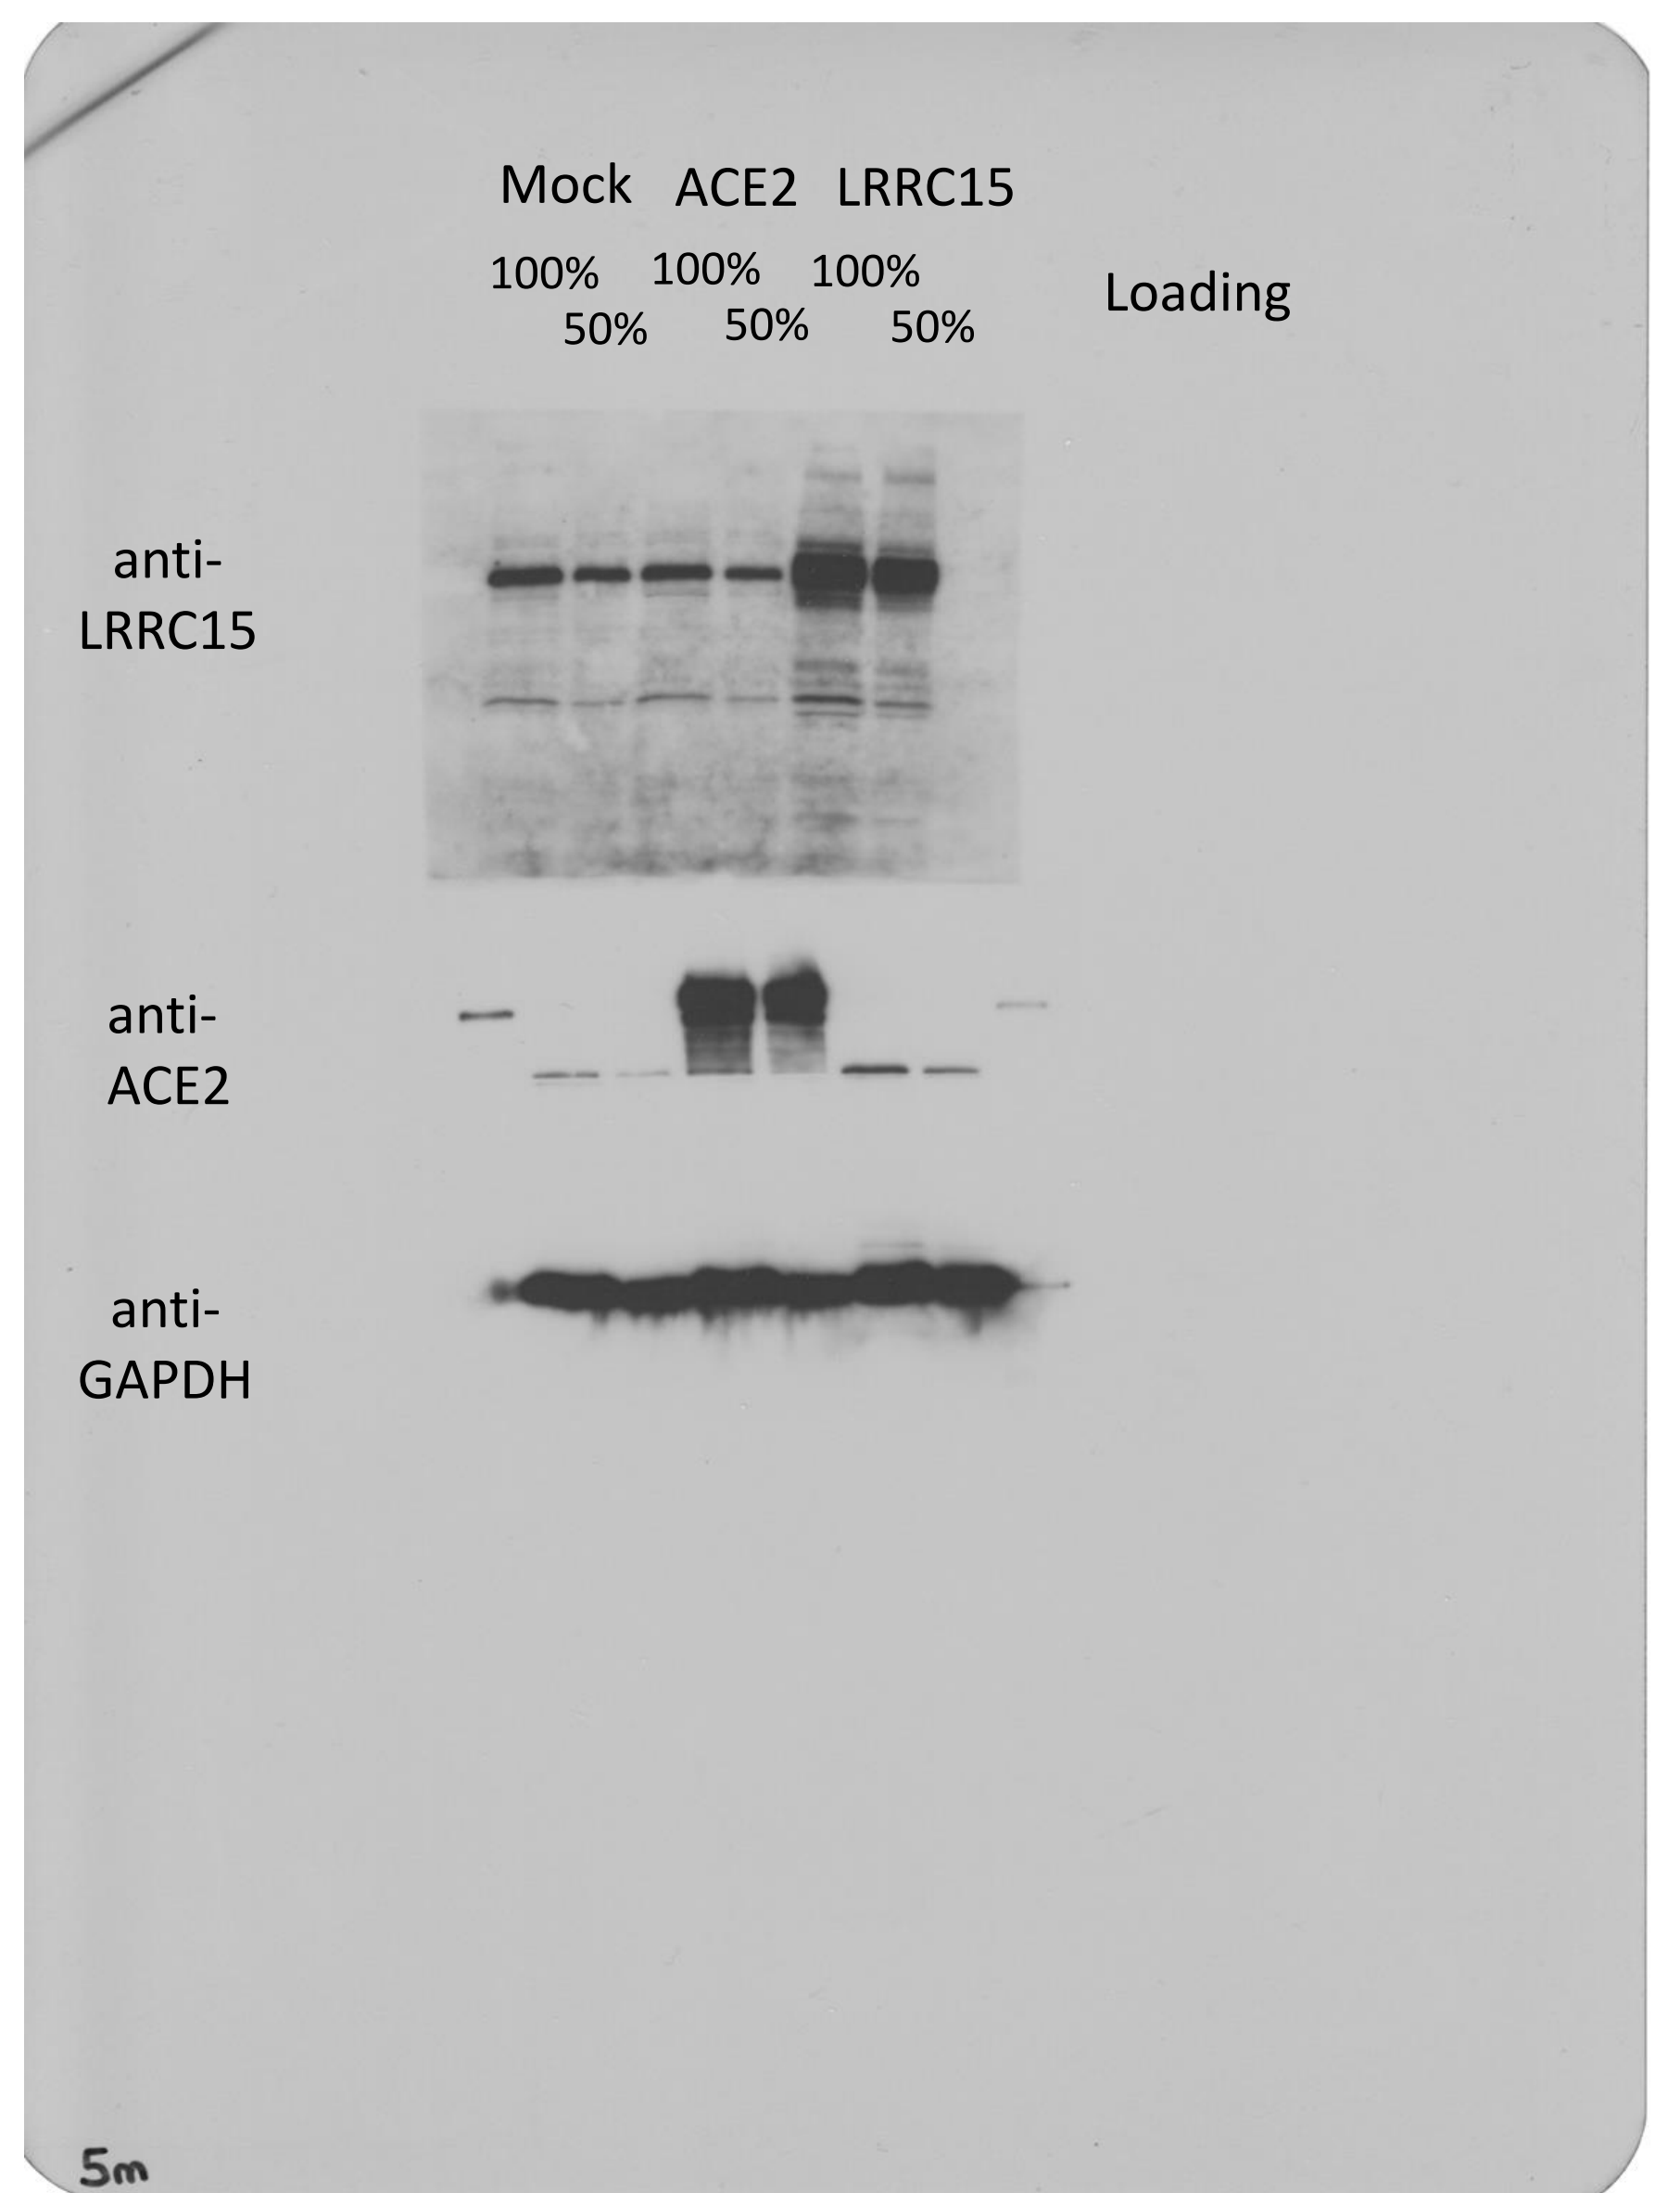

GAPDH exposure blot

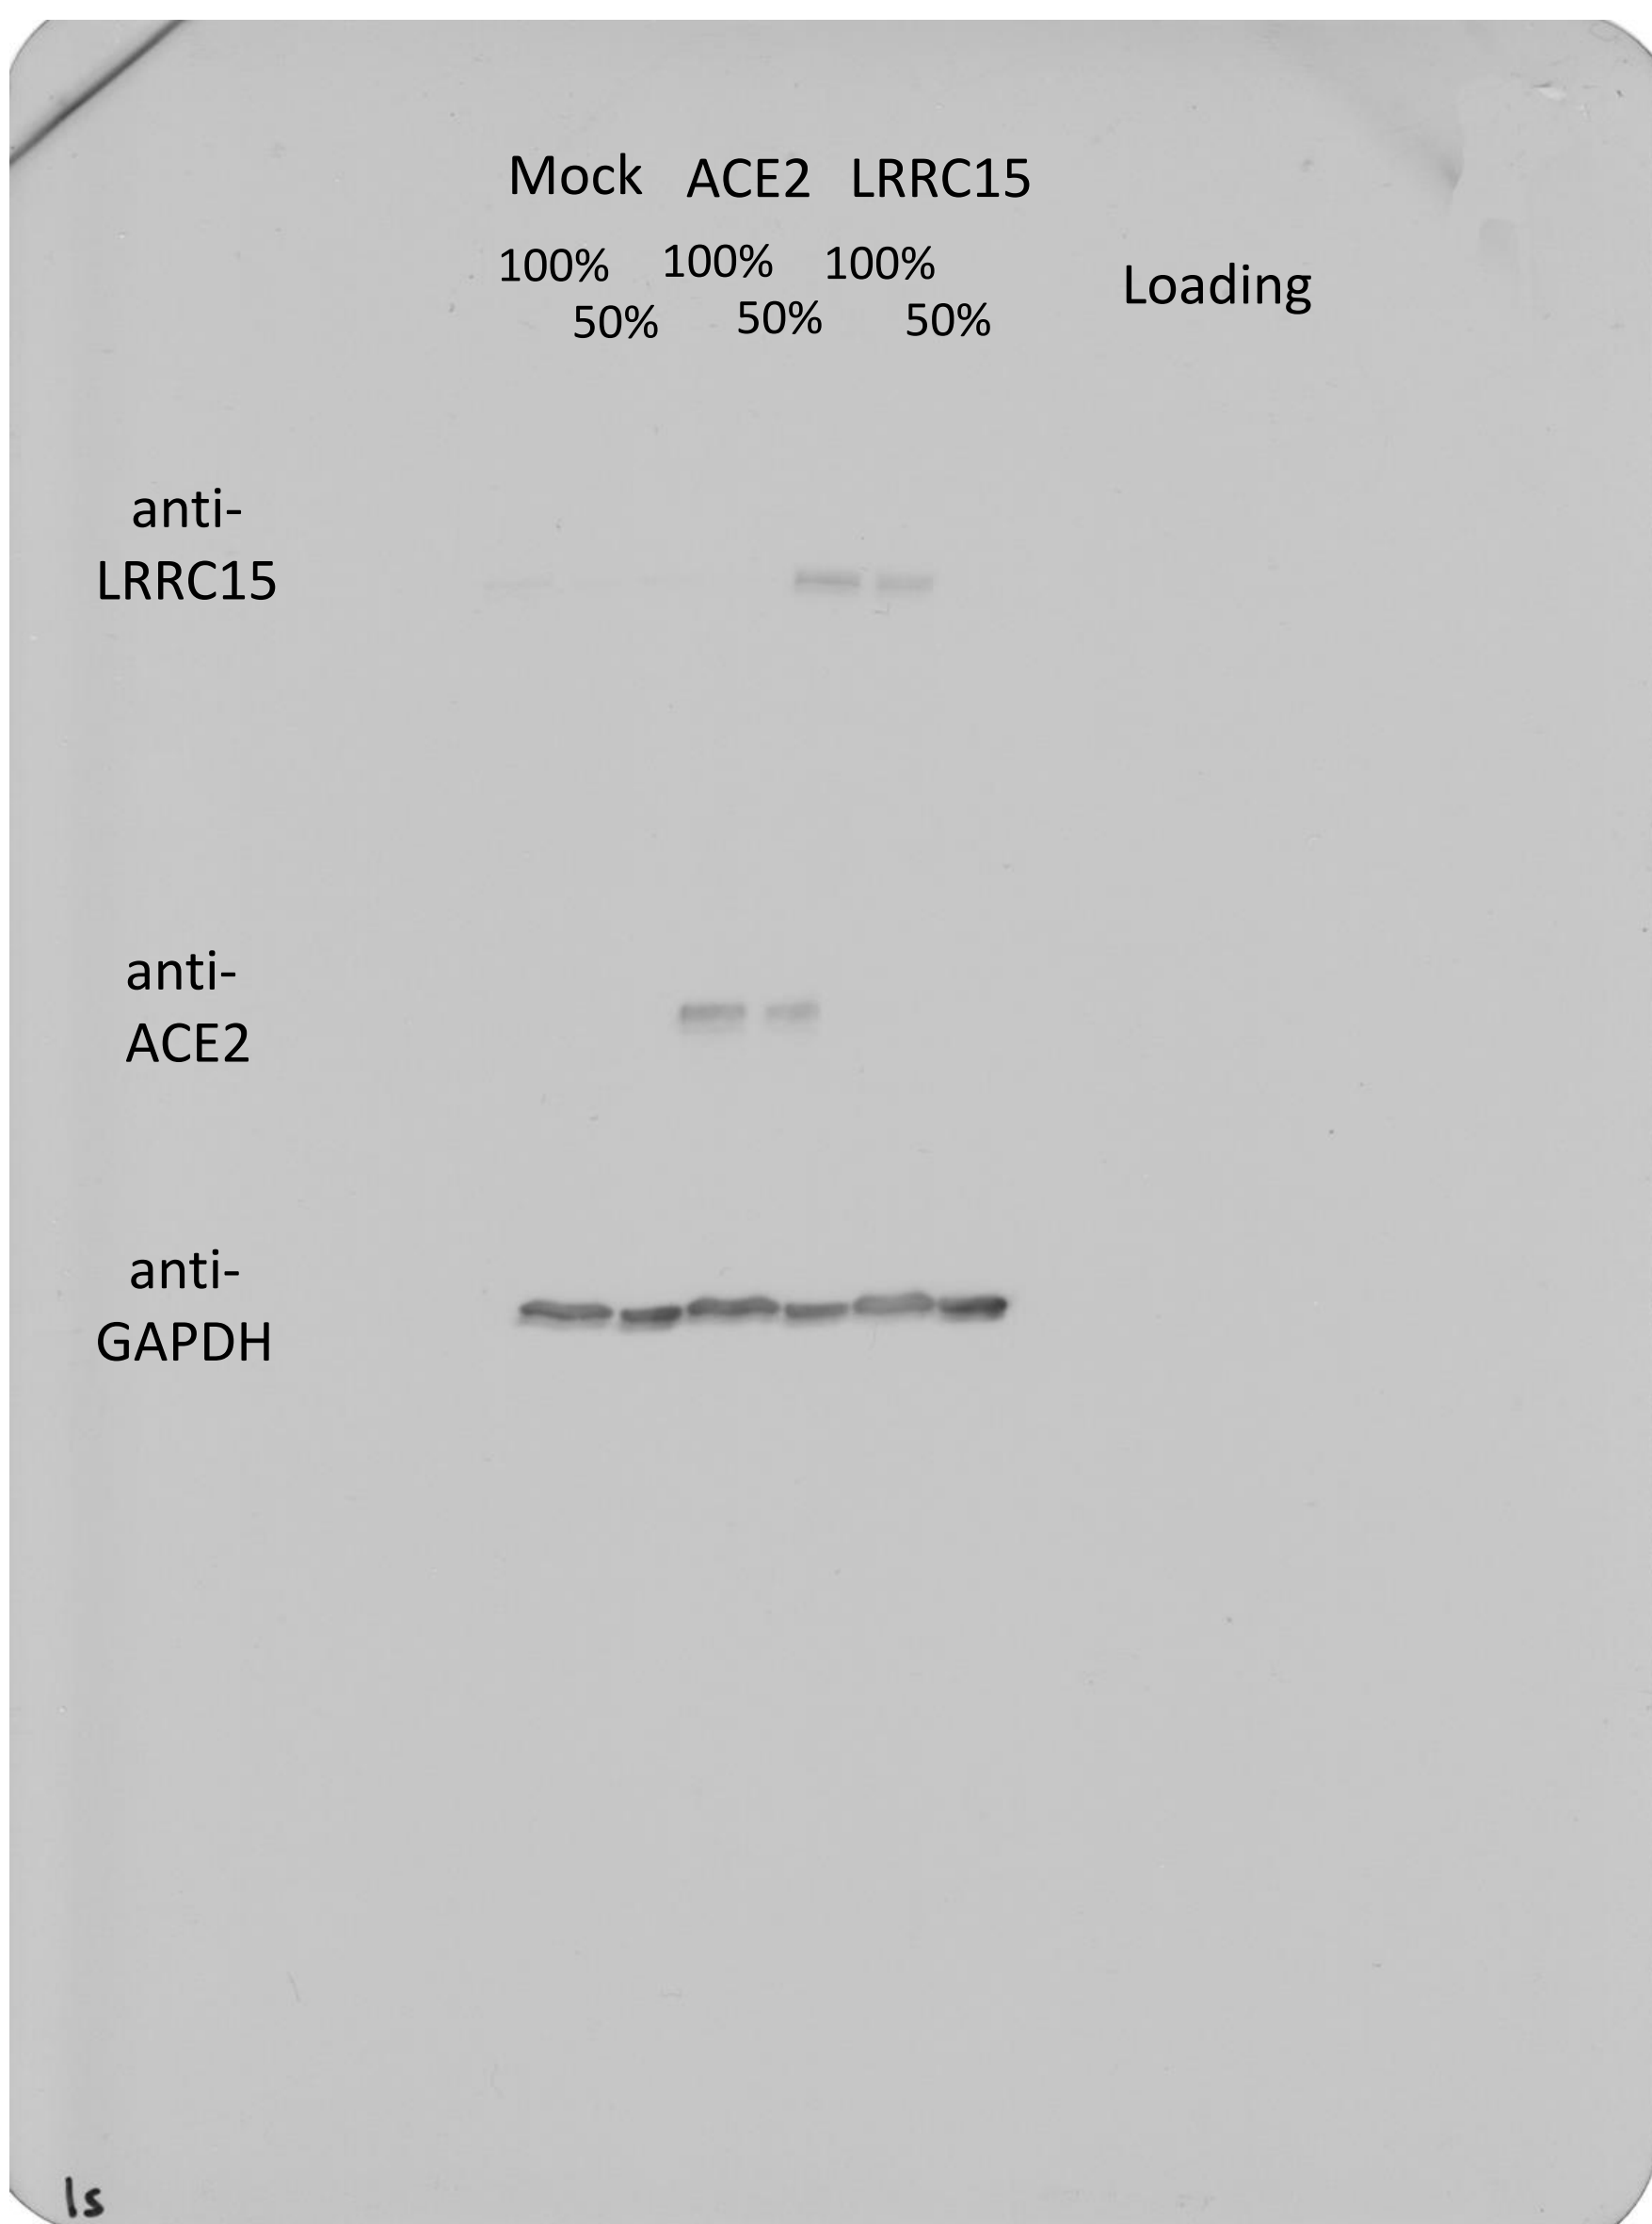

Molecular weight marker and original annotations

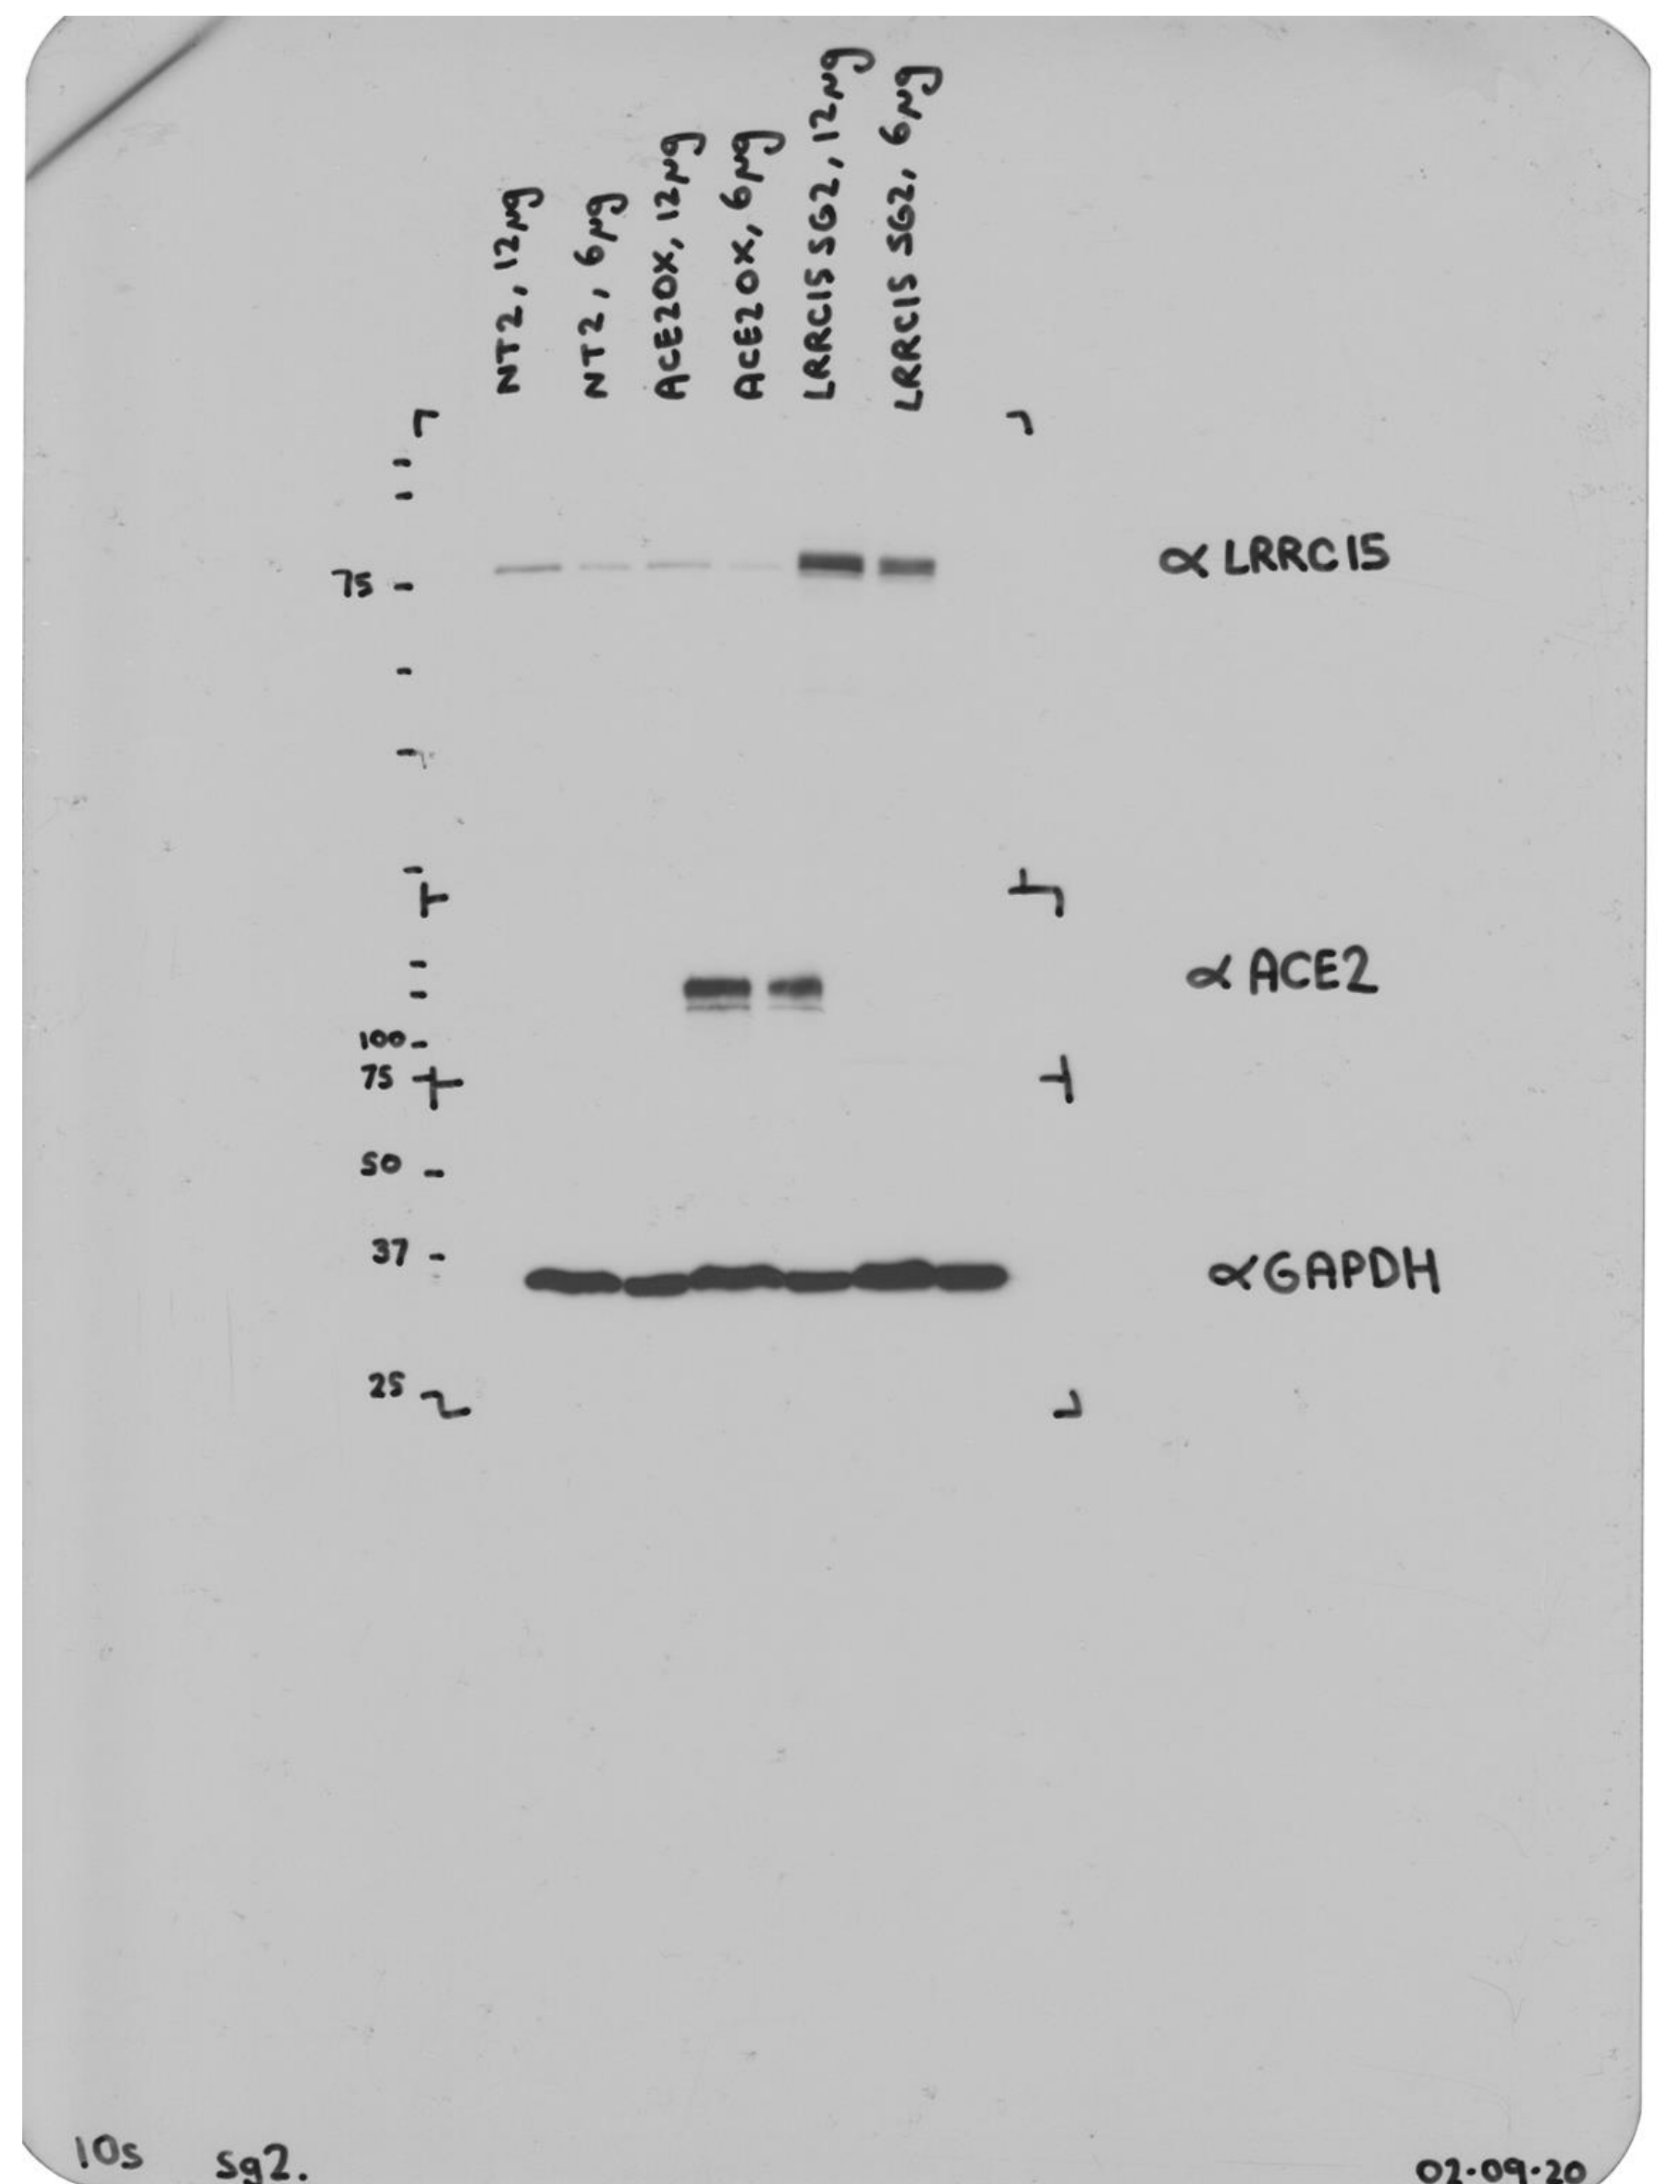

Original gels  
Figure 3 panel A

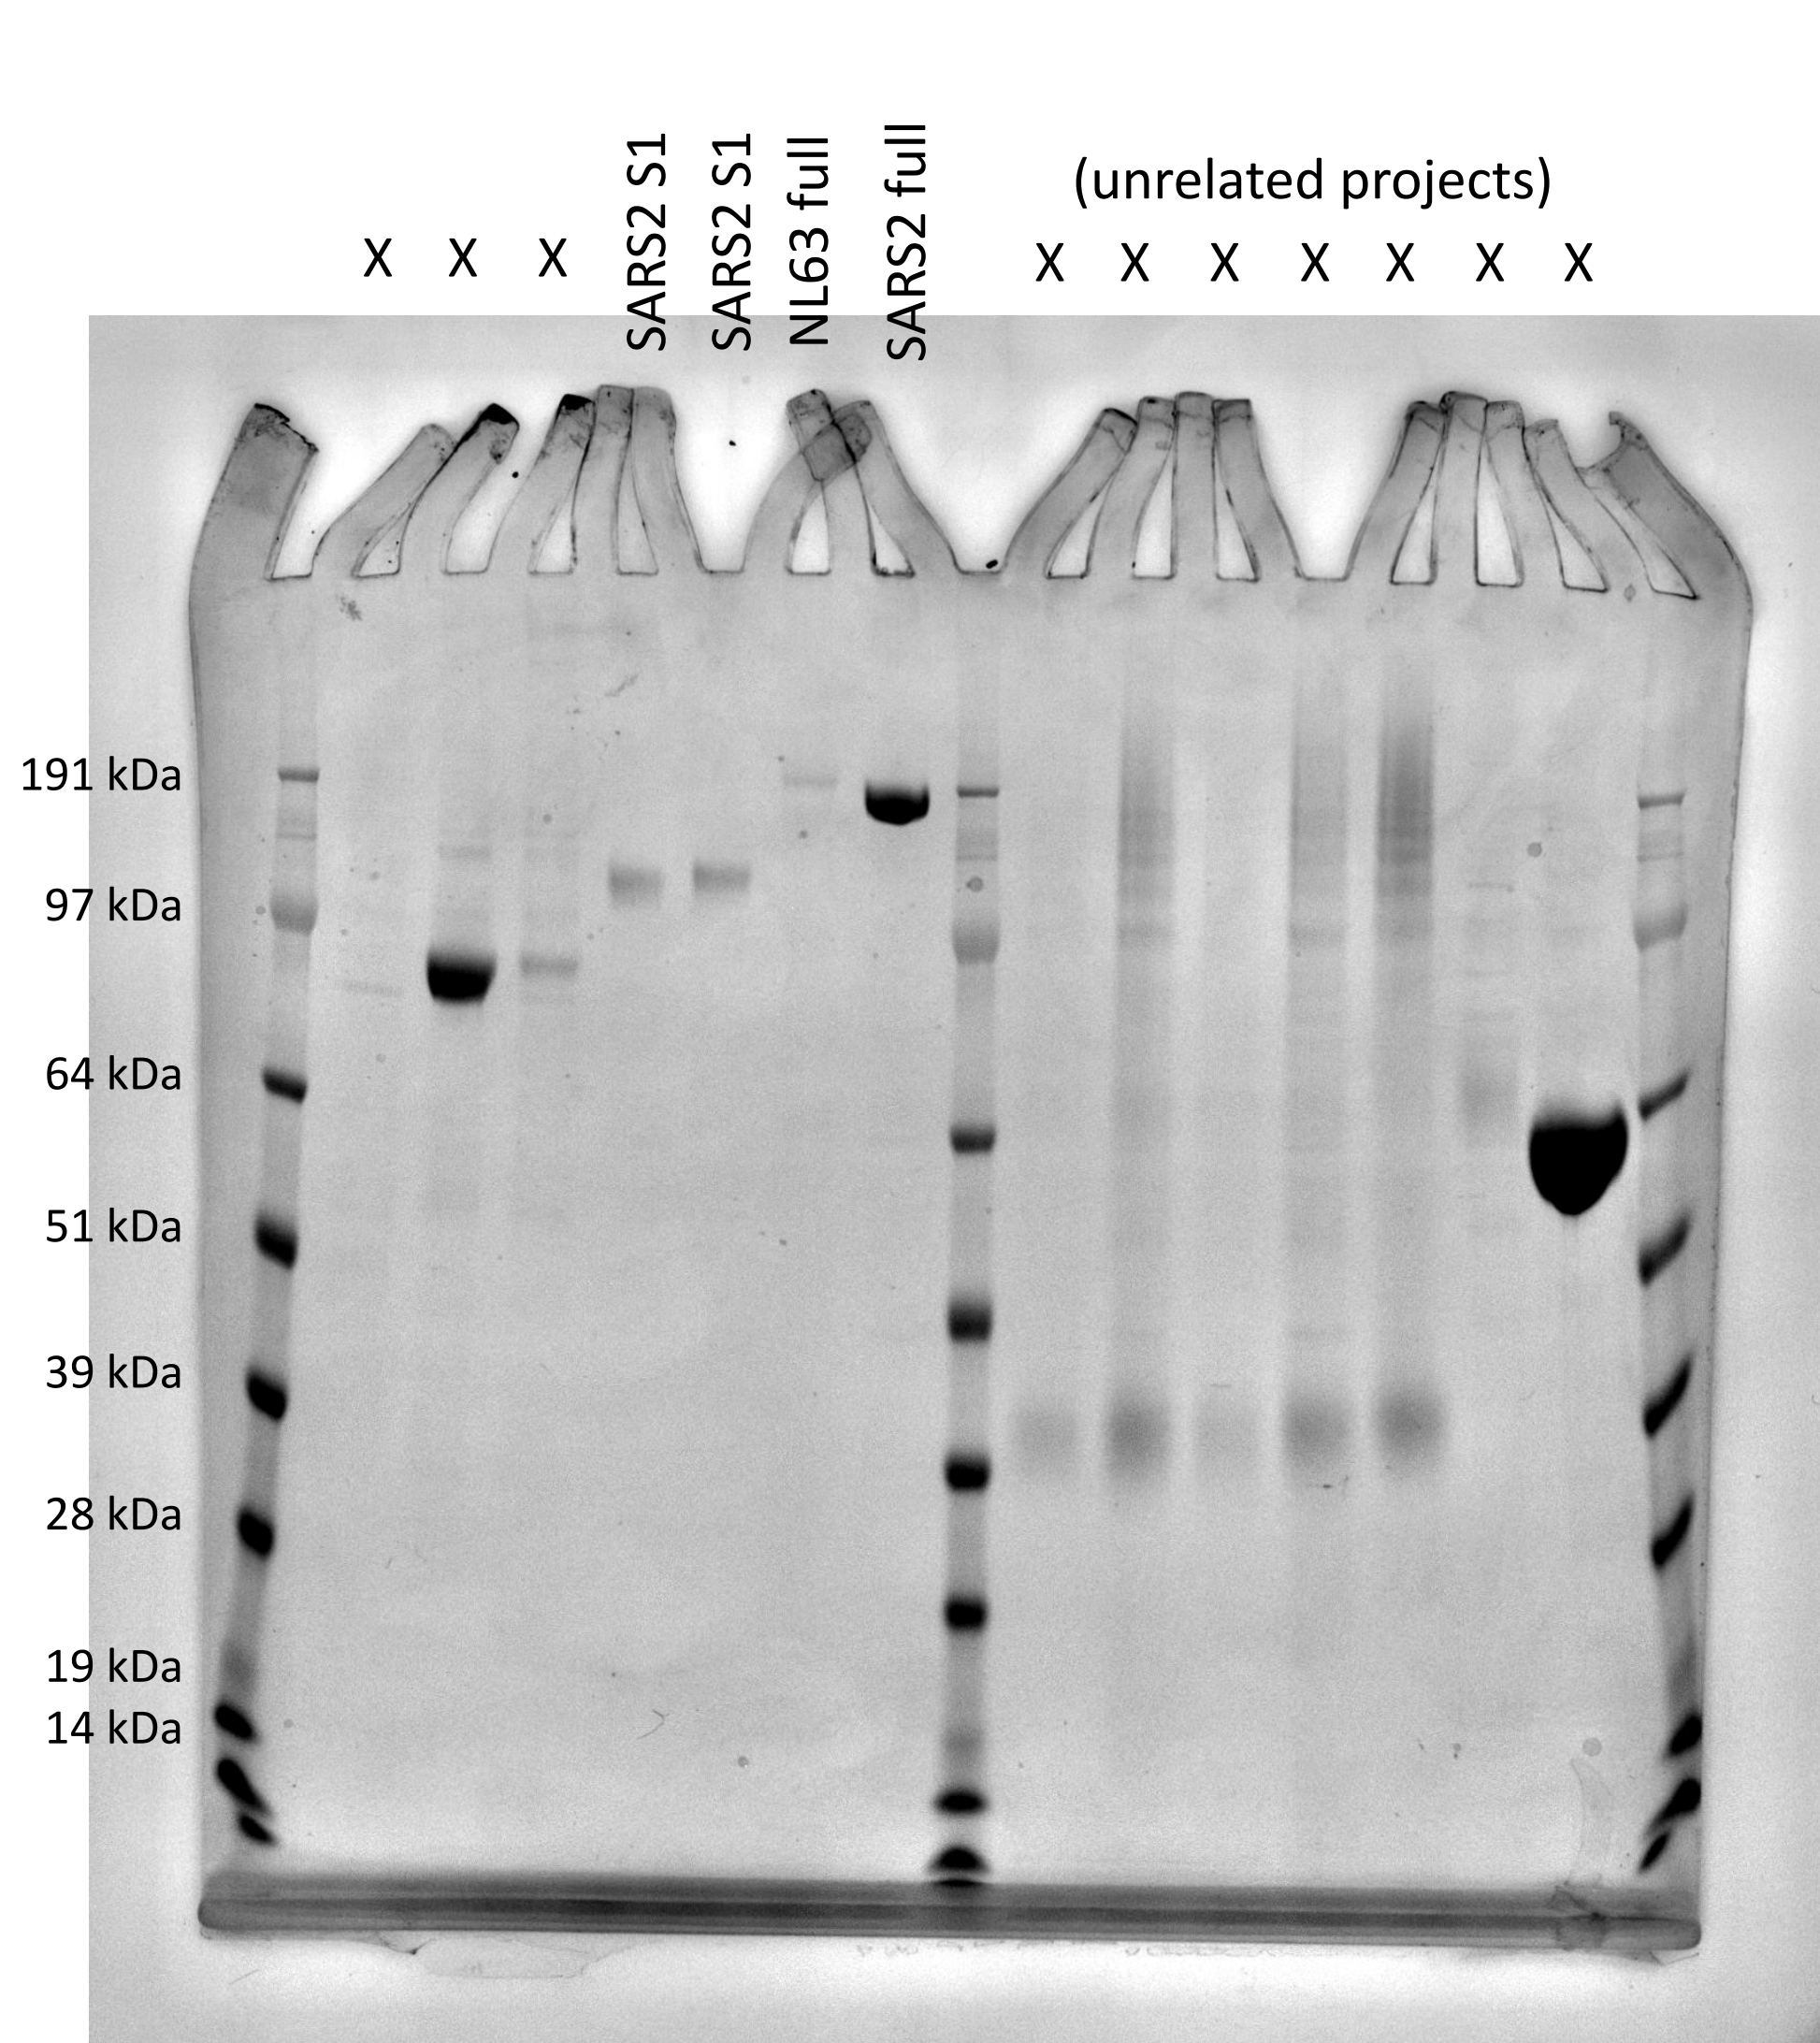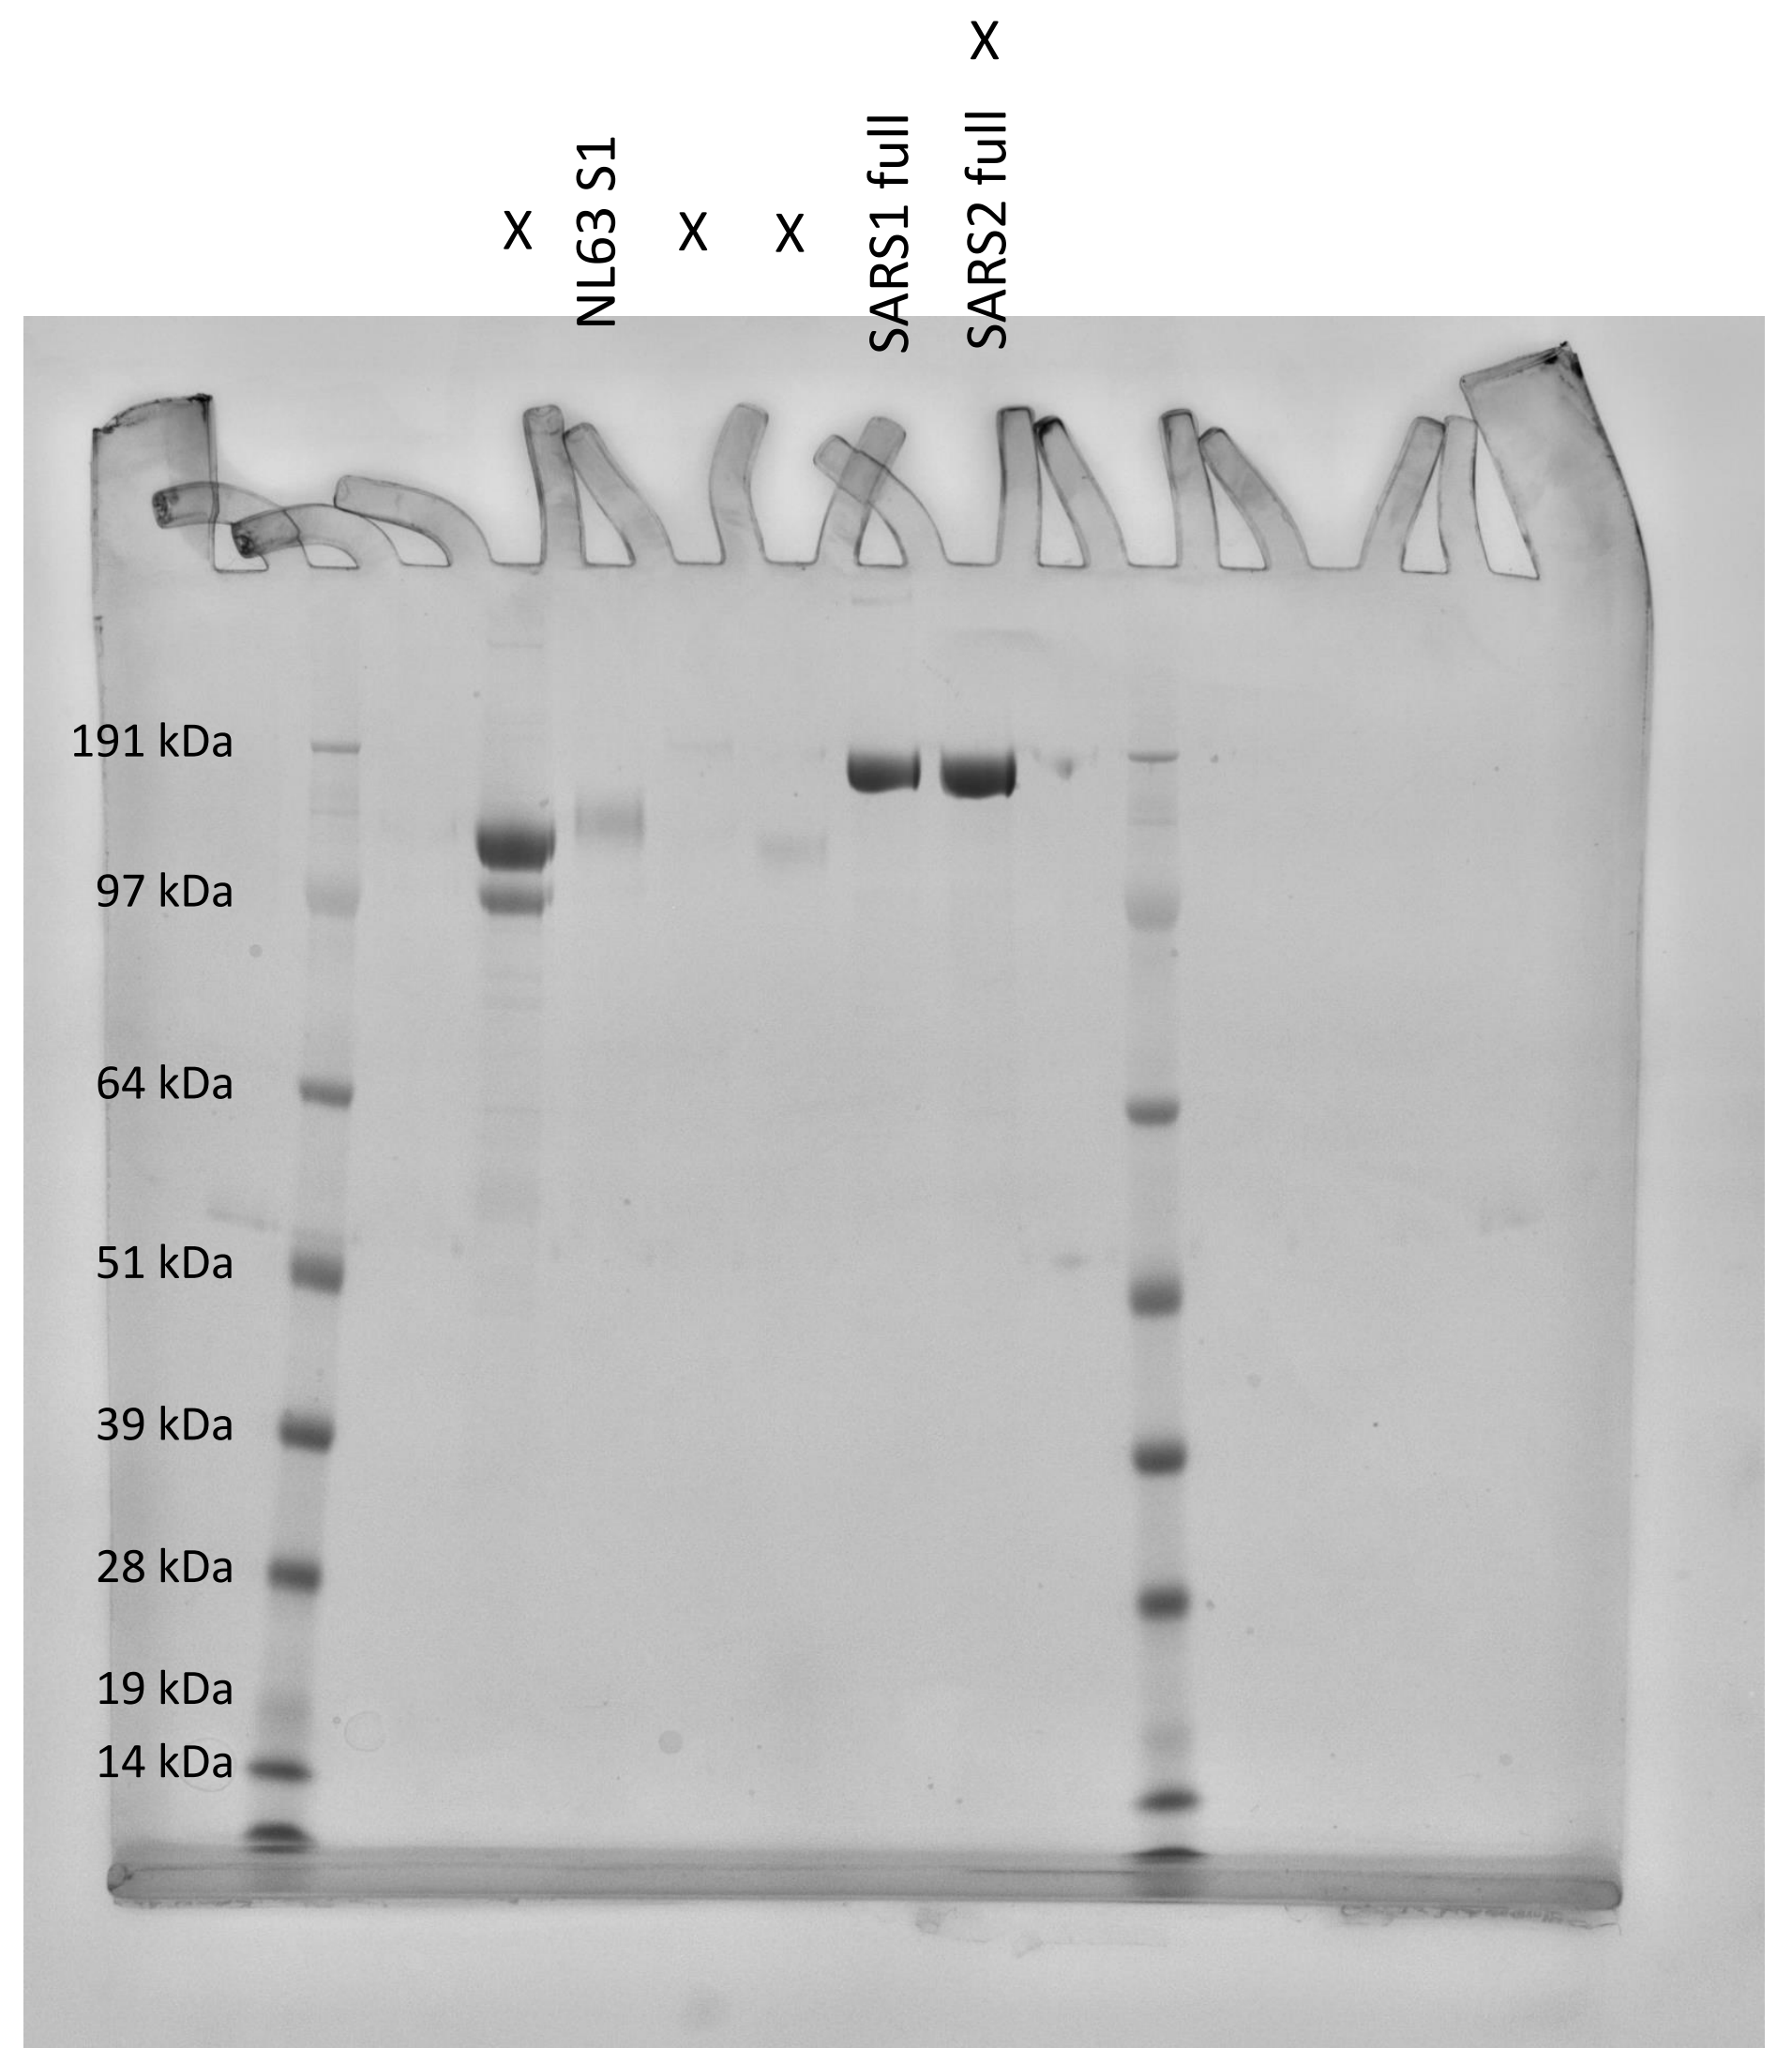

Supplement: pbio.3001959.s044.pdf [file pbio.3001959.s044.pdf]
