# Supplementary material for: LRRC15 mediates an accessory interaction with the SARS-CoV-2 spike protein
Source: PLoS Biol. 2023 Feb 3;21(2):e3001959. doi: 10.1371/journal.pbio.3001959 (PMC9897555; doi:10.1371/journal.pbio.3001959)
Supplement: S4 Data — (XLSX) [file pbio.3001959.s016.xlsx]

## Sheet: S2
gRNA gene	Spike stain percent
LRRC15	0.0016
LRRC15	0.11
LRRC15	0.179
LDLR	0.0028
LDLR	0.0028
LDLR	0.0032
ABCA1	0.0037
ABCA1	0.0027
ABCA1	0.0024
EBF1	0.0021
EBF1	0.0288
EBF1	0.0014
EXOSC8	0.0024
EXOSC8	0.0038
EXOSC8	0.004
IL6R	0.0023
IL6R	0.0017
IL6R	0.0041
ZIK1	0.0039
ZIK1	0.0025
ZIK1	0.0026
STEAP3	0.0024
STEAP3	0.0024
STEAP3	0.0014
LPPR1	0.0038
LPPR1	0.0014
LPPR1	0.0021
UGT8	0.003
UGT8	0.0059
UGT8	0.0041
NT	0.0023
NT	0.0036
NT	0.0025
ACE2	0.585
ACE2	0.935
ACE2	0.75
MYC1	0.0043
MYC1	0.0033
PCGF1	0.0017
PCGF1
ICAM1	0.0029
ICAM1	0.002
CAPN3
CAPN3	0.0036
CLDN18
CLDN18
BCL6
BCL6
ZNF449
ZNF449
HIF3A	0.0026
HIF3A
PVRL1	0.0022
PVRL1	0.0225
CDKN1C
CDKN1C
GATA6	0.153
GATA6	0.0076
HNRNPAB	0.0219
HNRNPAB	0.0258
FAM49A	0.0254
FAM49A	0.0206
LDLR	0.0033
LDLR	0.0034
EBF1	0.008
EXOSC8	0.0015
ZIK1	0.003
ZIK1	0.0016
LPPR1	0.0014
LRRC15	0.164
LRRC15	0.275
LRRC4	0.0089
LRRC4	0.0013
LRRC3C	0.00068
LRRC3C
LRRN2	0.005
LRRN2	0.0005
ABCA1	0.0041
EBF1	0.0055
IL6R	0.0082
IL6R	0.0124
GATA6	0.0182
GATA6	0.0109
PVRL1	0.0014
PVRL1	0.0011
