# Supplementary material for: LRRC15 mediates an accessory interaction with the SARS-CoV-2 spike protein
Source: PLoS Biol. 2023 Feb 3;21(2):e3001959. doi: 10.1371/journal.pbio.3001959 (PMC9897555; doi:10.1371/journal.pbio.3001959)
Supplement: S17 Data — (XLSX) [file pbio.3001959.s029.xlsx]

## Sheet: 3c
Sequence position	1	2	3	4	5	6	7	8	9	10	11	12	13	14	15	16	17	18	19	20	21	22	23	24	25	26	27	28	29	30	31	32	33	34	35	36	37	38	39	40	41	42	43	44	45	46	47	48	49
SARS2 (reference)	S	Q	C	V	N	L	T	T	R	T	Q	L	P	P	A	Y	T		N	S	F	T	R	G	V	Y	Y	P	D	K	V	F	R	S	S	V	L	H	S	T	Q	D	L	F	L	P	F	F	S
Conservation	7	8	11	8	9	8	7	7	0	8	11	7	11	8	6	8	8	0	9	11	5	8	11	11	11	11	11	11	11	7	9	11	11	11	7	8	11	8	5	11	11	11	11	11	11	11	11	9	11
Alignment consensus	[DS] 50%	[QR] 50%	C 100%	[TV] 50%	[NT] 50%	[FL] 50%	[DT] 50%	[DT] 50%	R 50%	[TV] 50%	Q 100%	[AL] 50%	P 100%	[NP] 50%	[AY] 50%	[TY] 50%	[QT] 50%	H 50%	[NT] 50%	S 100%	[FS] 50%	[MT] 50%	R 100%	G 100%	V 100%	Y 100%	Y 100%	P 100%	D 100%	[EK] 50%	[IV] 50%	F 100%	R 100%	S 100%	[DS] 50%	[TV] 50%	L 100%	[HY] 50%	[LS] 50%	T 100%	Q 100%	D 100%	L 100%	F 100%	L 100%	P 100%	F 100%	[FY] 50%	S 100%
[truncated: 621 more columns]
