# Supplementary material for: LRRC15 mediates an accessory interaction with the SARS-CoV-2 spike protein
Source: PLoS Biol. 2023 Feb 3;21(2):e3001959. doi: 10.1371/journal.pbio.3001959 (PMC9897555; doi:10.1371/journal.pbio.3001959)
Supplement: S28 Data — (XLSX) [file pbio.3001959.s040.xlsx]

## Sheet: 4h
condition	cell_line	MOI	plate	sgRNA	Percent_CoV2_positive
control	WT	0.005	E002	set1	68.4
control	WT	0.005	E002	set1	65.7
control	WT	0.005	E002	set1	63.1
control	WT	0.005	E002	set1	68.7
control	WT	0.005	E002	set1	65.2
control	WT	0.05	E002	set1	46.4
control	WT	0.05	E002	set1	44.6
control	WT	0.05	E002	set1	48
control	WT	0.05	E002	set1	48.7
control	WT	0.05	E002	set1	58.2
control	28	0.005	E002	set2	69.2
control	28	0.005	E002	set2	72.5
control	28	0.005	E002	set2	73.4
control	28	0.005	E002	set2	65.6
control	28	0.005	E002	set2	79.8
control	28	0.05	E002	set2	54.4
control	28	0.05	E002	set2	64.1
control	28	0.05	E002	set2	64.5
control	28	0.05	E002	set2	57.4
control	28	0.05	E002	set2	67.9
control	28	0.005	E002	set2	78.2
control	28	0.005	E002	set2	67
control	28	0.005	E002	set2	60.9
control	28	0.005	E002	set2	64
control	28	0.005	E002	set2	74
control	28	0.05	E002	set2	45.2
control	28	0.05	E002	set2	49.6
control	28	0.05	E002	set2	52.7
control	28	0.05	E002	set2	53.8
control	28	0.05	E002	set2	65.2
control	28	0.005	E002	set2	74.4
control	28	0.005	E002	set2	66.8
control	28	0.005	E002	set2	72.3
control	28	0.005	E002	set2	89.9
control	28	0.005	E002	set2	73.8
control	28	0.05	E002	set2	59.6
control	28	0.05	E002	set2	49.8
control	28	0.05	E002	set2	57.8
control	28	0.05	E002	set2	56.9
control	28	0.05	E002	set2	50.6
control	28	0.005	E002	set2	68
control	28	0.005	E002	set2	65.2
control	28	0.005	E002	set2	67
control	28	0.005	E002	set2	69.2
control	28	0.005	E002	set2	69.8
control	28	0.05	E002	set2	67.5
control	28	0.05	E002	set2	60.8
control	28	0.05	E002	set2	61.5
control	28	0.05	E002	set2	58.7
control	28	0.05	E002	set2	57.4
LRRC15	LRRC15.P	0.005	E002	set1	71.5
LRRC15	LRRC15.P	0.005	E002	set1	72.5
LRRC15	LRRC15.P	0.005	E002	set1	82.7
LRRC15	LRRC15.P	0.005	E002	set1	78.1
LRRC15	LRRC15.P	0.005	E002	set1	82.5
LRRC15	LRRC15.P	0.05	E002	set1	67.6
LRRC15	LRRC15.P	0.05	E002	set1	69.1
LRRC15	LRRC15.P	0.05	E002	set1	65.1
LRRC15	LRRC15.P	0.05	E002	set1	71.3
LRRC15	LRRC15.P	0.05	E002	set1	59.4
LRRC15	LRRC15.H	0.005	E002	set2	88.8
LRRC15	LRRC15.H	0.005	E002	set2	86.8
LRRC15	LRRC15.H	0.005	E002	set2	79.5
LRRC15	LRRC15.H	0.005	E002	set2	80
LRRC15	LRRC15.H	0.05	E002	set2	58.6
LRRC15	LRRC15.H	0.05	E002	set2	48.1
LRRC15	LRRC15.H	0.05	E002	set2	58.1
LRRC15	LRRC15.H	0.05	E002	set2	50.8
LRRC15	LRRC15.B	0.005	E002	set3	83.8
LRRC15	LRRC15.B	0.005	E002	set3	78.2
LRRC15	LRRC15.B	0.005	E002	set3	85.8
LRRC15	LRRC15.B	0.005	E002	set3	70.6
LRRC15	LRRC15.B	0.005	E002	set3	84.4
LRRC15	LRRC15.B	0.05	E002	set3	64
LRRC15	LRRC15.B	0.05	E002	set3	62.2
LRRC15	LRRC15.B	0.05	E002	set3	57.1
LRRC15	LRRC15.B	0.05	E002	set3	65.5
LRRC15	LRRC15.B	0.05	E002	set3	57.5
control	WT	0.005	E004	set1	61.8
control	WT	0.005	E004	set1	60.7
control	WT	0.005	E004	set1	62.9
control	WT	0.005	E004	set1	56.5
control	WT	0.005	E004	set1	54.6
control	WT	0.05	E004	set1	49.3
control	WT	0.05	E004	set1	48.9
control	WT	0.05	E004	set1	47.6
control	WT	0.05	E004	set1	43.2
control	WT	0.05	E004	set1	41.6
control	28	0.005	E004	set2	64.6
control	28	0.005	E004	set2	64.1
control	28	0.005	E004	set2	72.4
control	28	0.005	E004	set2	62
control	28	0.005	E004	set2	59.1
control	28	0.05	E004	set2	53.3
control	28	0.05	E004	set2	52.5
control	28	0.05	E004	set2	53.1
control	28	0.05	E004	set2	53
control	28	0.05	E004	set2	56.4
control	28	0.005	E004	set2	66.1
control	28	0.005	E004	set2	57.7
control	28	0.005	E004	set2	63
control	28	0.005	E004	set2	58
control	28	0.005	E004	set2	53
control	28	0.05	E004	set2	44.4
control	28	0.05	E004	set2	48.1
control	28	0.05	E004	set2	50.1
control	28	0.05	E004	set2	52.9
control	28	0.05	E004	set2	50
control	28	0.005	E004	set2	70.1
control	28	0.005	E004	set2	63.9
control	28	0.005	E004	set2	69.1
control	28	0.005	E004	set2	64.2
control	28	0.005	E004	set2	55.9
control	28	0.05	E004	set2	53.8
control	28	0.05	E004	set2	43.8
control	28	0.05	E004	set2	53.3
control	28	0.05	E004	set2	55.4
control	28	0.05	E004	set2	57.5
control	28	0.005	E004	set2	66.7
control	28	0.005	E004	set2	61.1
control	28	0.005	E004	set2	62.3
control	28	0.005	E004	set2	59.2
control	28	0.005	E004	set2	57.5
control	28	0.05	E004	set2	53.3
control	28	0.05	E004	set2	50.4
control	28	0.05	E004	set2	50.8
control	28	0.05	E004	set2	51
control	28	0.05	E004	set2	54.2
LRRC15	LRRC15.P	0.005	E004	set1	72.2
LRRC15	LRRC15.P	0.005	E004	set1	65.4
LRRC15	LRRC15.P	0.005	E004	set1	64
LRRC15	LRRC15.P	0.005	E004	set1	66.7
LRRC15	LRRC15.P	0.005	E004	set1	62.2
LRRC15	LRRC15.P	0.05	E004	set1	49.3
LRRC15	LRRC15.P	0.05	E004	set1	48.2
LRRC15	LRRC15.P	0.05	E004	set1	54.6
LRRC15	LRRC15.P	0.05	E004	set1	56.2
LRRC15	LRRC15.P	0.05	E004	set1	53.4
LRRC15	LRRC15.H	0.005	E004	set2	71.6
LRRC15	LRRC15.H	0.005	E004	set2	55.5
LRRC15	LRRC15.H	0.005	E004	set2	52.6
LRRC15	LRRC15.H	0.005	E004	set2	58.8
LRRC15	LRRC15.H	0.005	E004	set2	55.5
LRRC15	LRRC15.H	0.05	E004	set2	47.9
LRRC15	LRRC15.H	0.05	E004	set2	37.4
LRRC15	LRRC15.H	0.05	E004	set2	45.2
LRRC15	LRRC15.H	0.05	E004	set2	50.4
LRRC15	LRRC15.H	0.05	E004	set2	50.5
LRRC15	LRRC15.B	0.005	E004	set3	76.3
LRRC15	LRRC15.B	0.005	E004	set3	76.6
LRRC15	LRRC15.B	0.005	E004	set3	73.6
LRRC15	LRRC15.B	0.005	E004	set3	74.5
LRRC15	LRRC15.B	0.005	E004	set3	68.6
LRRC15	LRRC15.B	0.05	E004	set3	52.6
LRRC15	LRRC15.B	0.05	E004	set3	60.3
LRRC15	LRRC15.B	0.05	E004	set3	48.8
LRRC15	LRRC15.B	0.05	E004	set3	55.2
LRRC15	LRRC15.B	0.05	E004	set3	55
